# Supplementary material for: The genomic landscape of swine influenza A viruses in Southeast Asia
Source: PubMed Central journal article supplement — Proc Natl Acad Sci U S A. 2023 Aug 8;120(33):e2301926120. doi: 10.1073/pnas.2301926120 (PMC10438389; doi:10.1073/pnas.2301926120), 2023-08-08
Supplement: pnas.2301926120.sapp.pdf [file pnas.2301926120.sapp.pdf]

## Supporting Information for

### The genomic landscape of swine influenza A viruses in Southeast Asia

Michael A Zeller, Jordan Ma, Foong Ying Wong, Sothyra Tum, Arata  
Hidano, Hannah Holt, Ty Chhay, Sorn San, Dina Koeut, Bunnary Seng,  
Sovanncheypo Chao, Giselle GK Ng, Zhuang Yan, Monidarin Chou,  
James W Rudge, Gavin JD Smith, Yvonne CF Su

Corresponding authors: Gavin JD Smith, Yvonne CF Su  
Email: [gavin.smith@duke-nus.edu.sg](mailto:gavin.smith@duke-nus.edu.sg); [yvonne.su@duke-nus.edu.sg](mailto:yvonne.su@duke-nus.edu.sg)

#### **This PDF file includes:**

Figures S1 to S21  
Tables S1 to S6

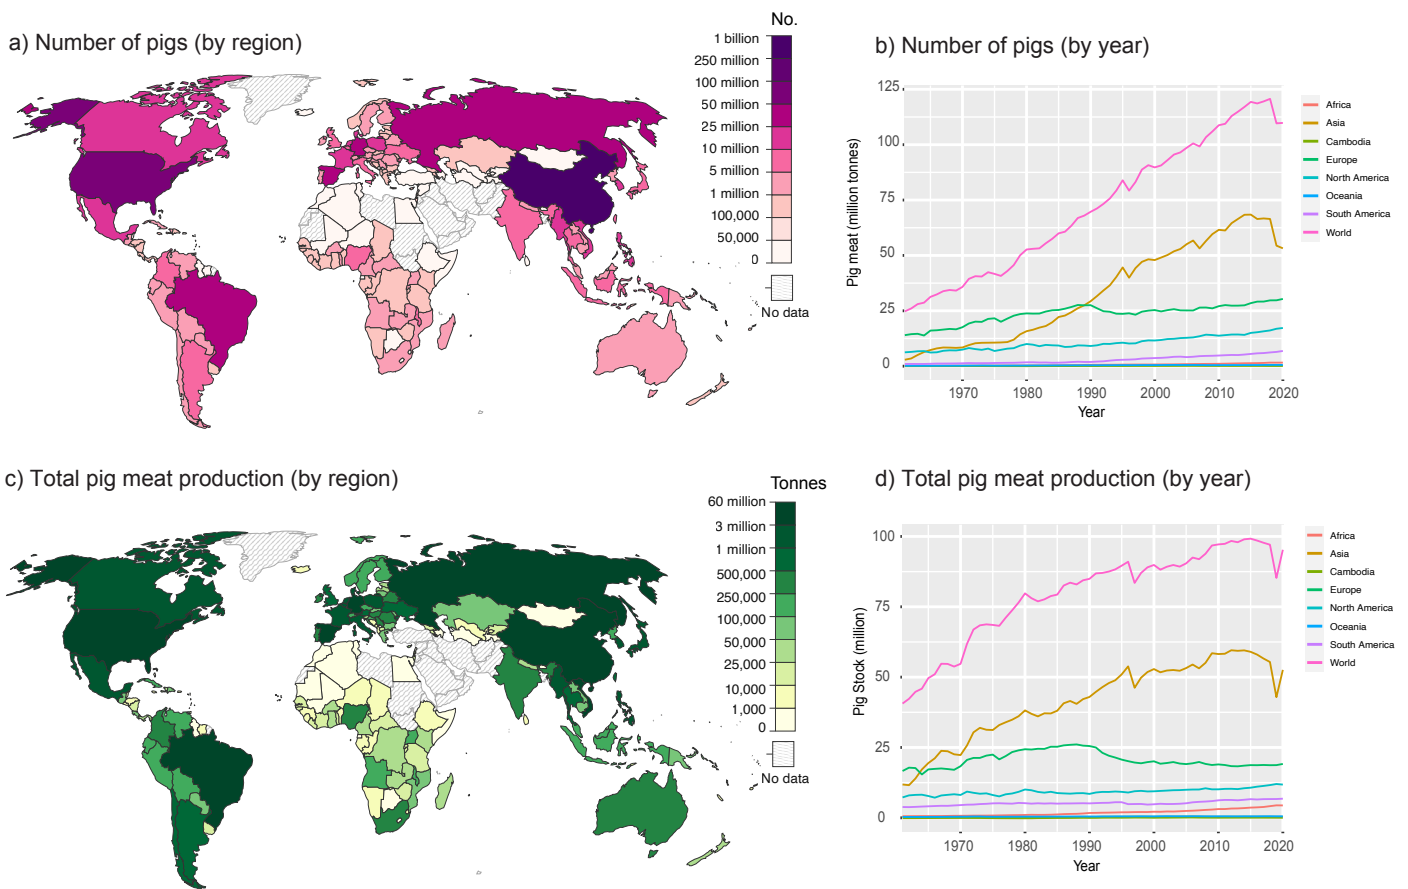

**Fig. S1.** Comparison of pig production in different geographic regions. (a) Global distribution of pig populations in 2020. (b) Number of pigs in the world by year. (c) Global distribution of total pig meat production in 2020. (d) Total pig meat production by year. Source: The United Nations Food and Agriculture Organization (FAO) and Our World in Data (OWID).

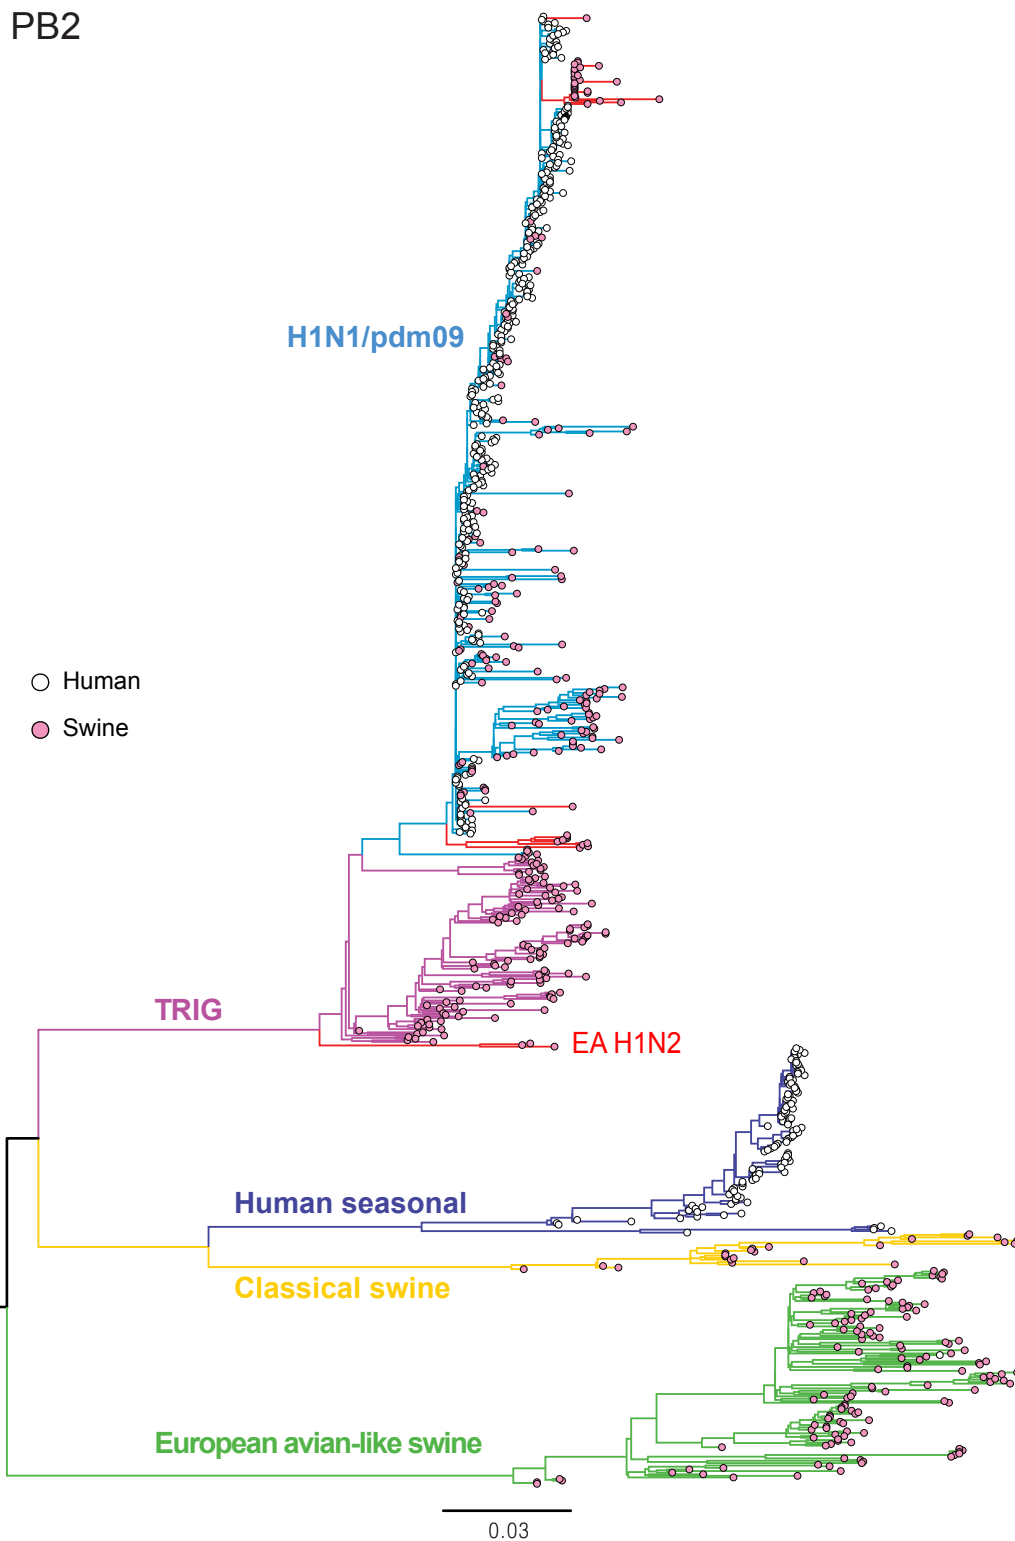

**Fig. S2.** Maximum likelihood phylogeny of the PB2 gene of human and swine influenza viruses. Coloured branches represent major lineages. Red branches denote swine sequences generated in this study. The novel EA H1N2 from pigs in Cambodia is indicated. Human and swine viruses are shown by pink and white tip circles. The scale bar represents the number of nucleotide substitutions per site.

PB1

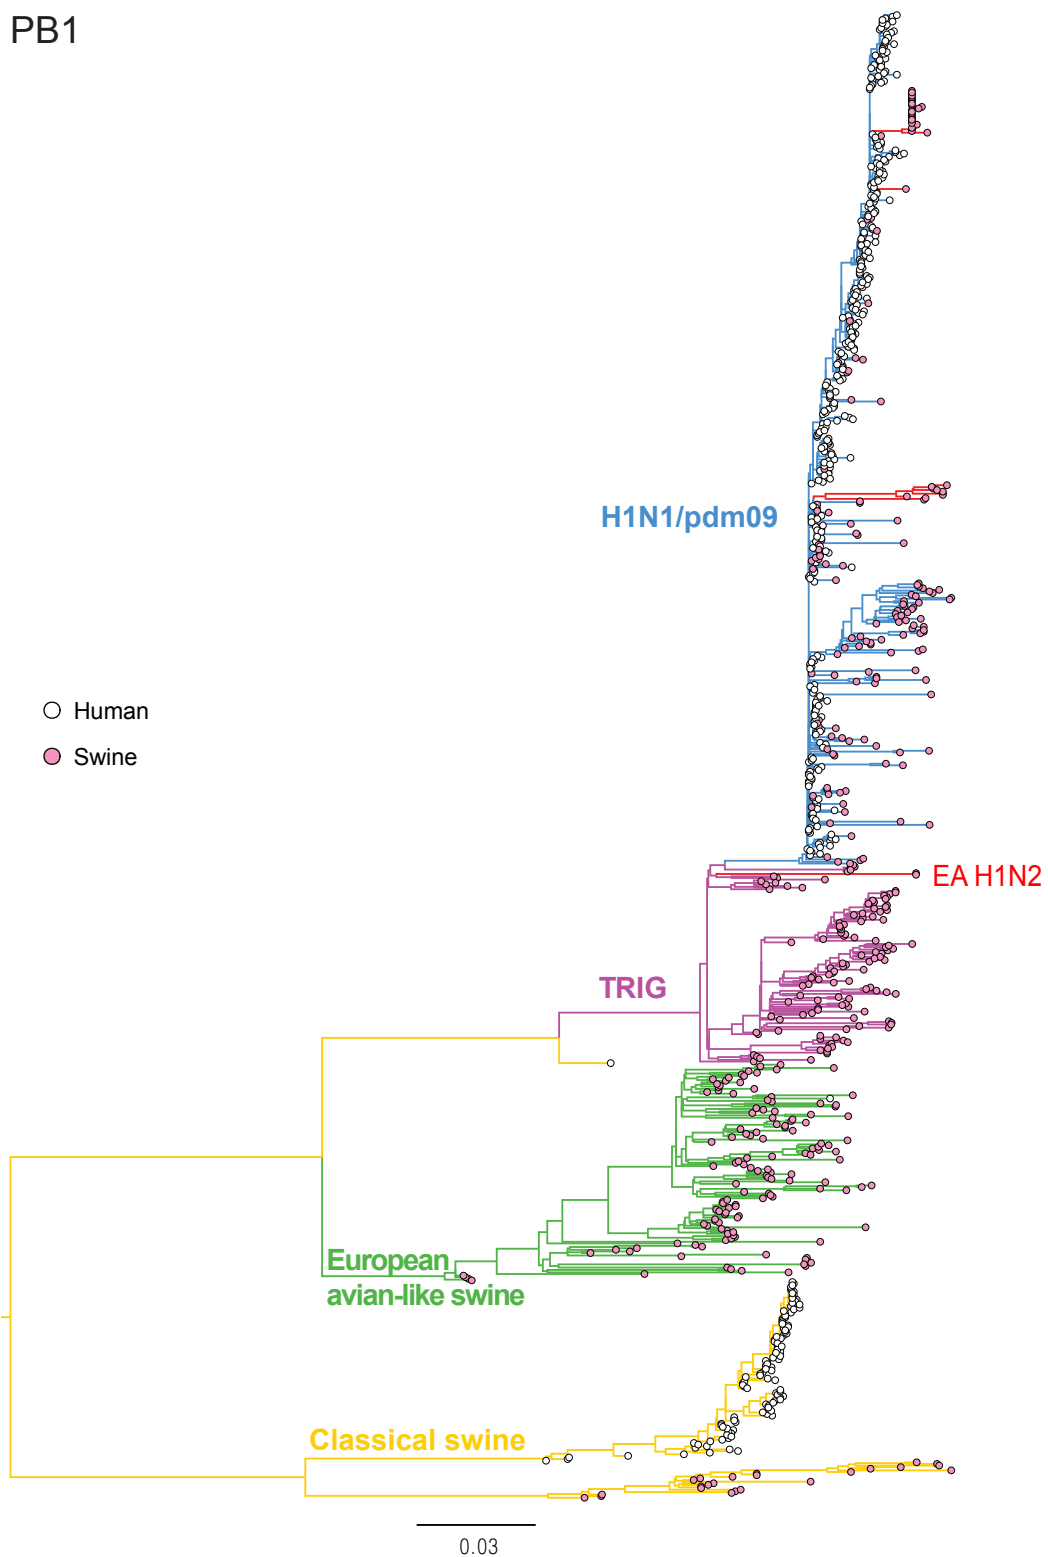

**Fig. S3.** Maximum likelihood phylogeny of the PB1 gene of human and swine influenza viruses. Coloured branches represent major lineages. Red branches denote swine sequences generated in this study. The novel EA H1N2 from pigs in Cambodia is indicated. Human and swine viruses are shown by pink and white tip circles. The scale bar represents the number of nucleotide substitutions per site.

PA

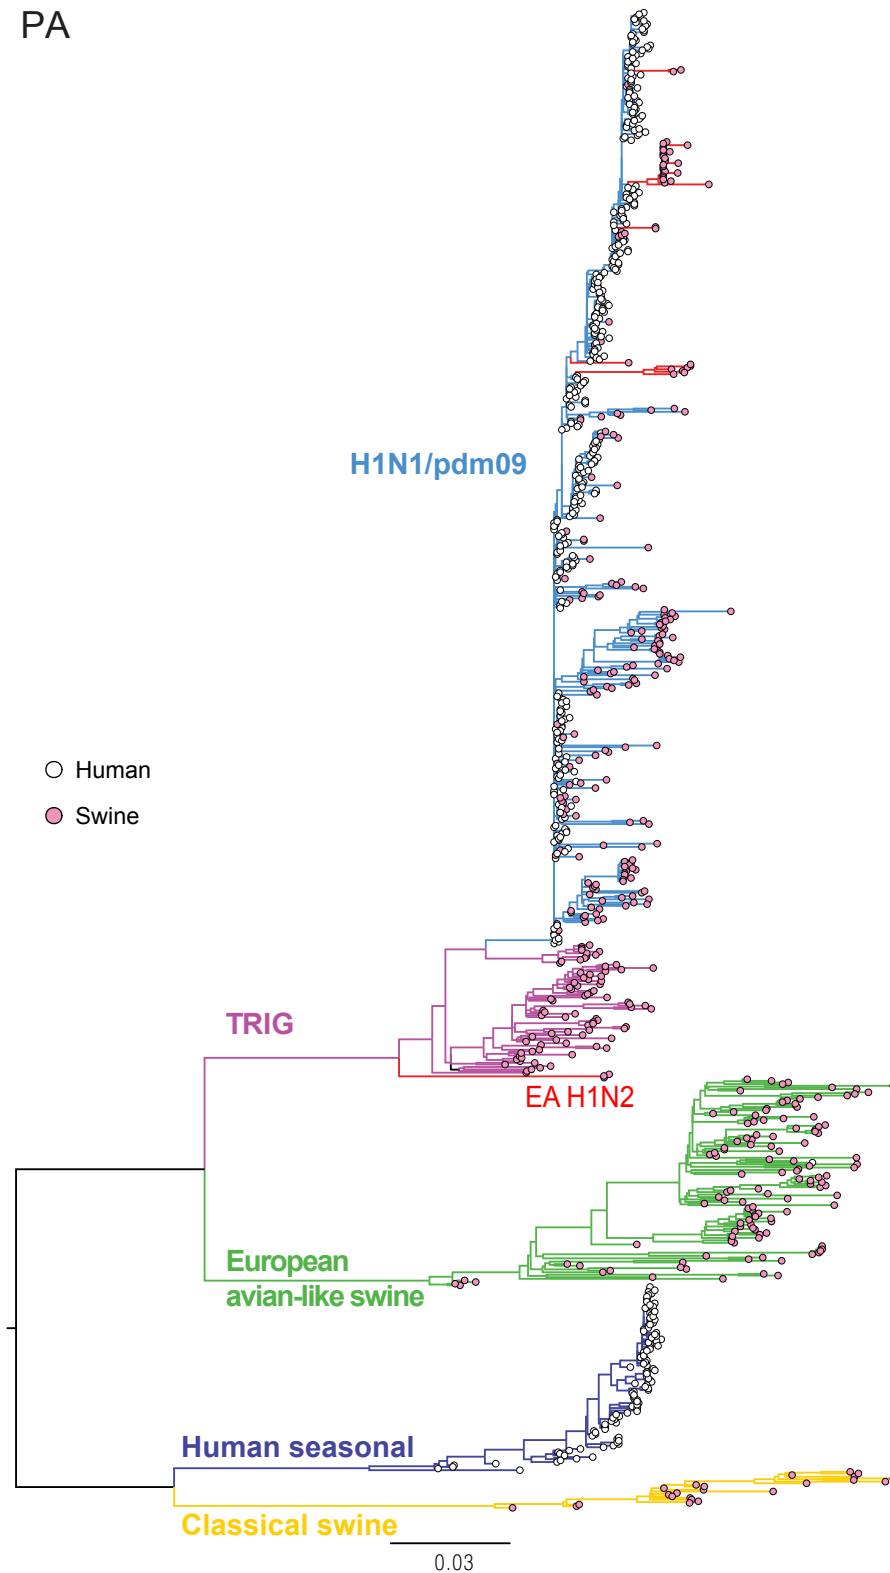

**Fig. S4.** Maximum likelihood phylogeny of the PA gene of human and swine influenza viruses. Coloured branches represent major lineages. Red branches denote swine sequences generated in this study. The novel EA H1N2 from pigs in Cambodia is indicated. Human and swine viruses are shown by pink and white tip circles. The scale bar represents the number of nucleotide substitutions per site.

NP

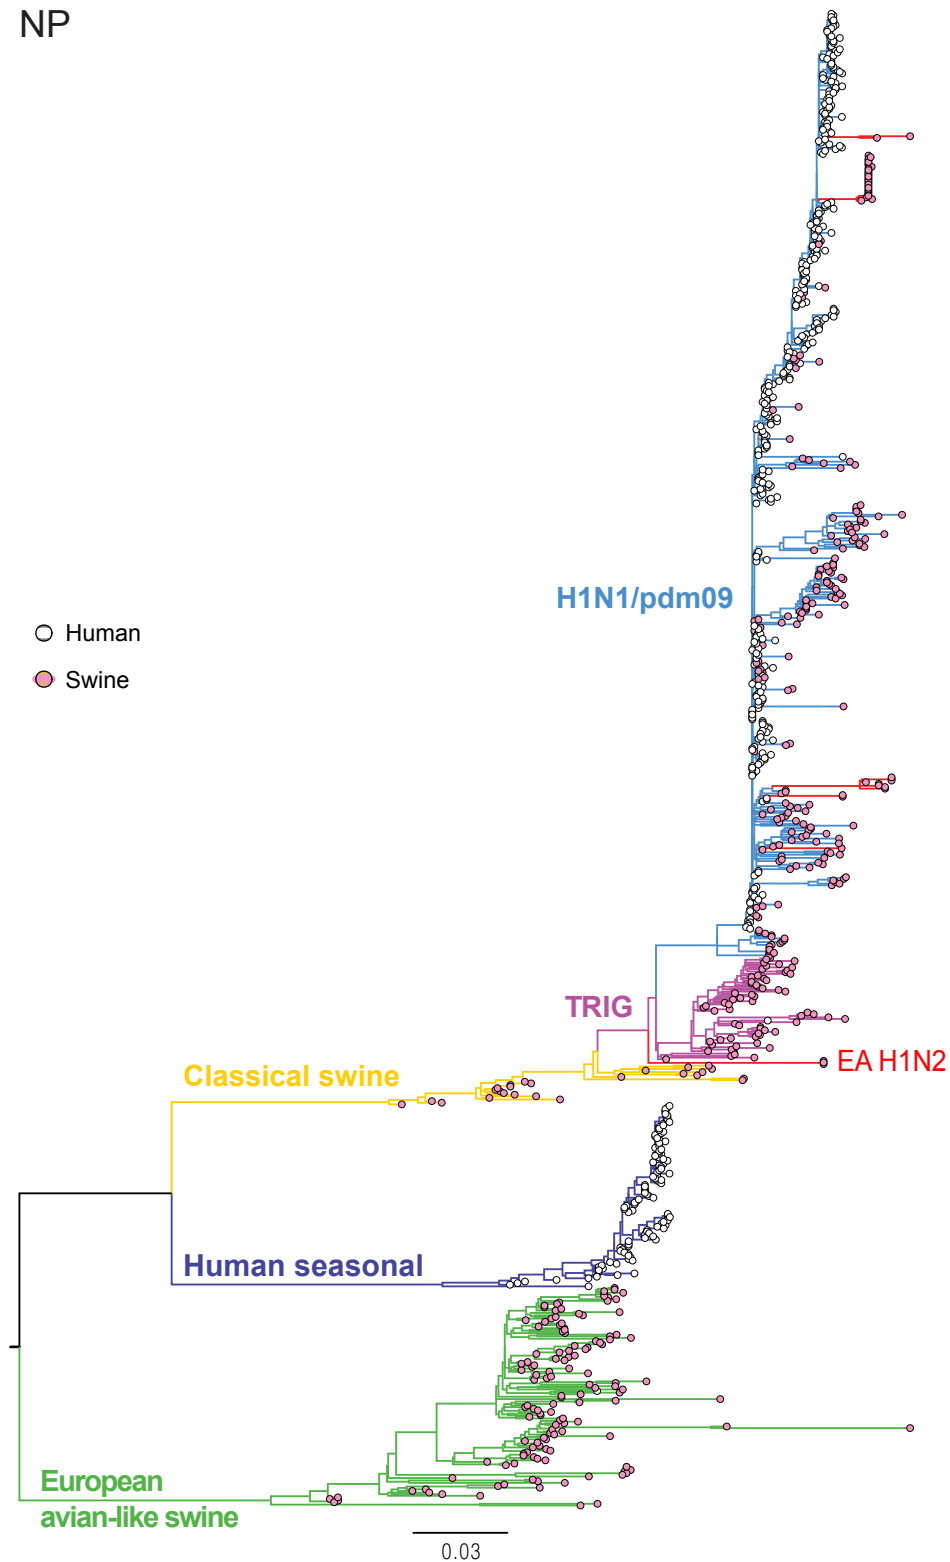

**Fig. S5.** Maximum likelihood phylogeny of the NP gene of human and swine influenza viruses. Coloured branches represent major lineages. Red branches denote swine sequences generated in this study. The novel EA H1N2 from pigs in Cambodia is indicated. Human and swine viruses are shown by pink and white tip circles. The scale bar represents the number of nucleotide substitutions per site.

MP

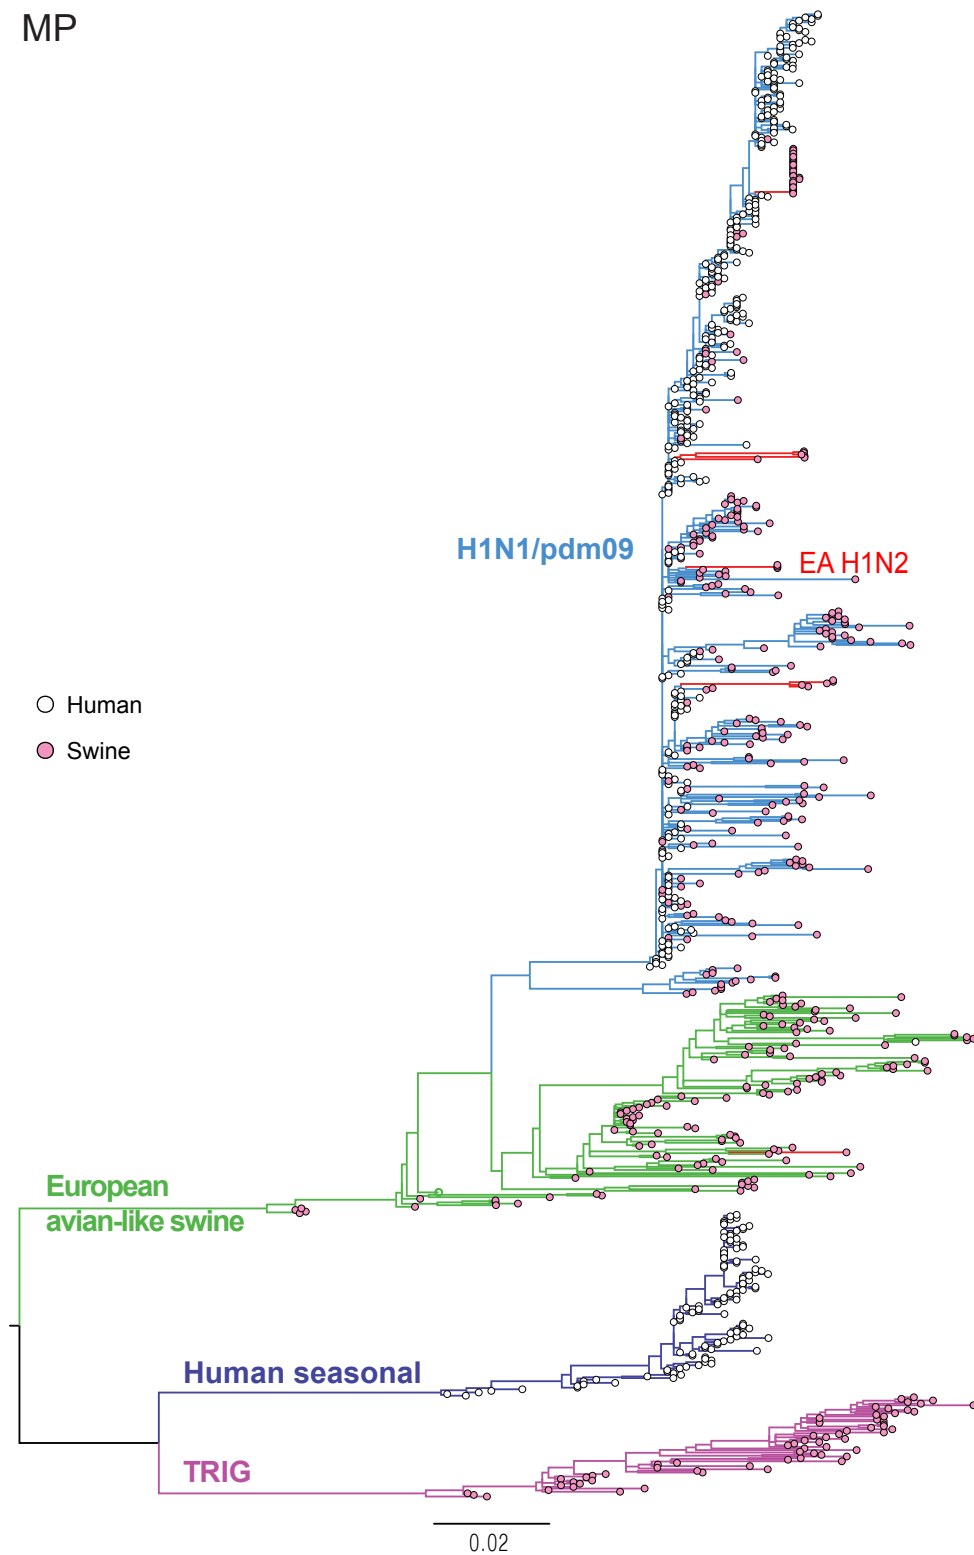

**Fig. S6.** Maximum likelihood phylogeny of the MP gene of human and swine influenza viruses. Coloured branches represent major lineages. Red branches denote swine sequences generated in this study. The novel EA H1N2 from pigs in Cambodia is indicated. Human and swine viruses are shown by pink and white tip circles. The scale bar represents the number of nucleotide substitutions per site.

NS

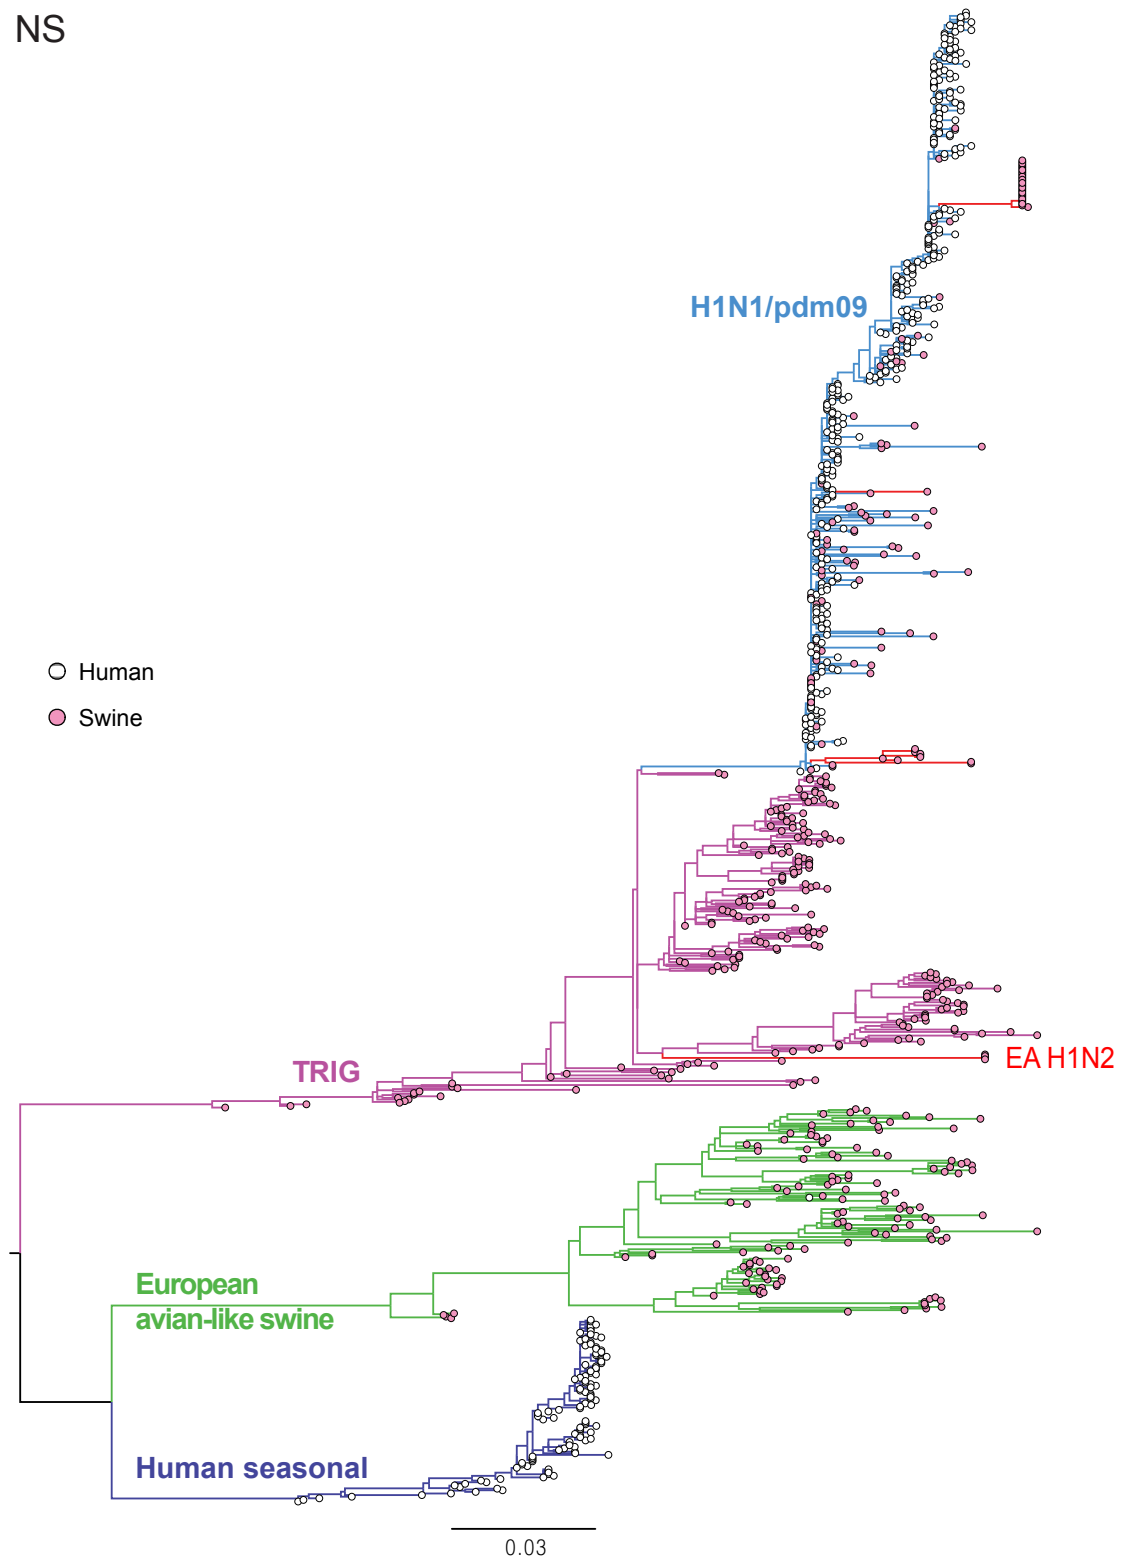

**Fig. S7.** Maximum likelihood phylogeny of the NS gene of human and swine influenza viruses. Coloured branches represent major lineages. Red branches denote swine sequences generated in this study. The novel EA H1N2 from pigs in Cambodia is indicated. Human and swine viruses are shown by pink and white tip circles. The scale bar represents the number of nucleotide substitutions per site.



# H1-HA European avian-like swine

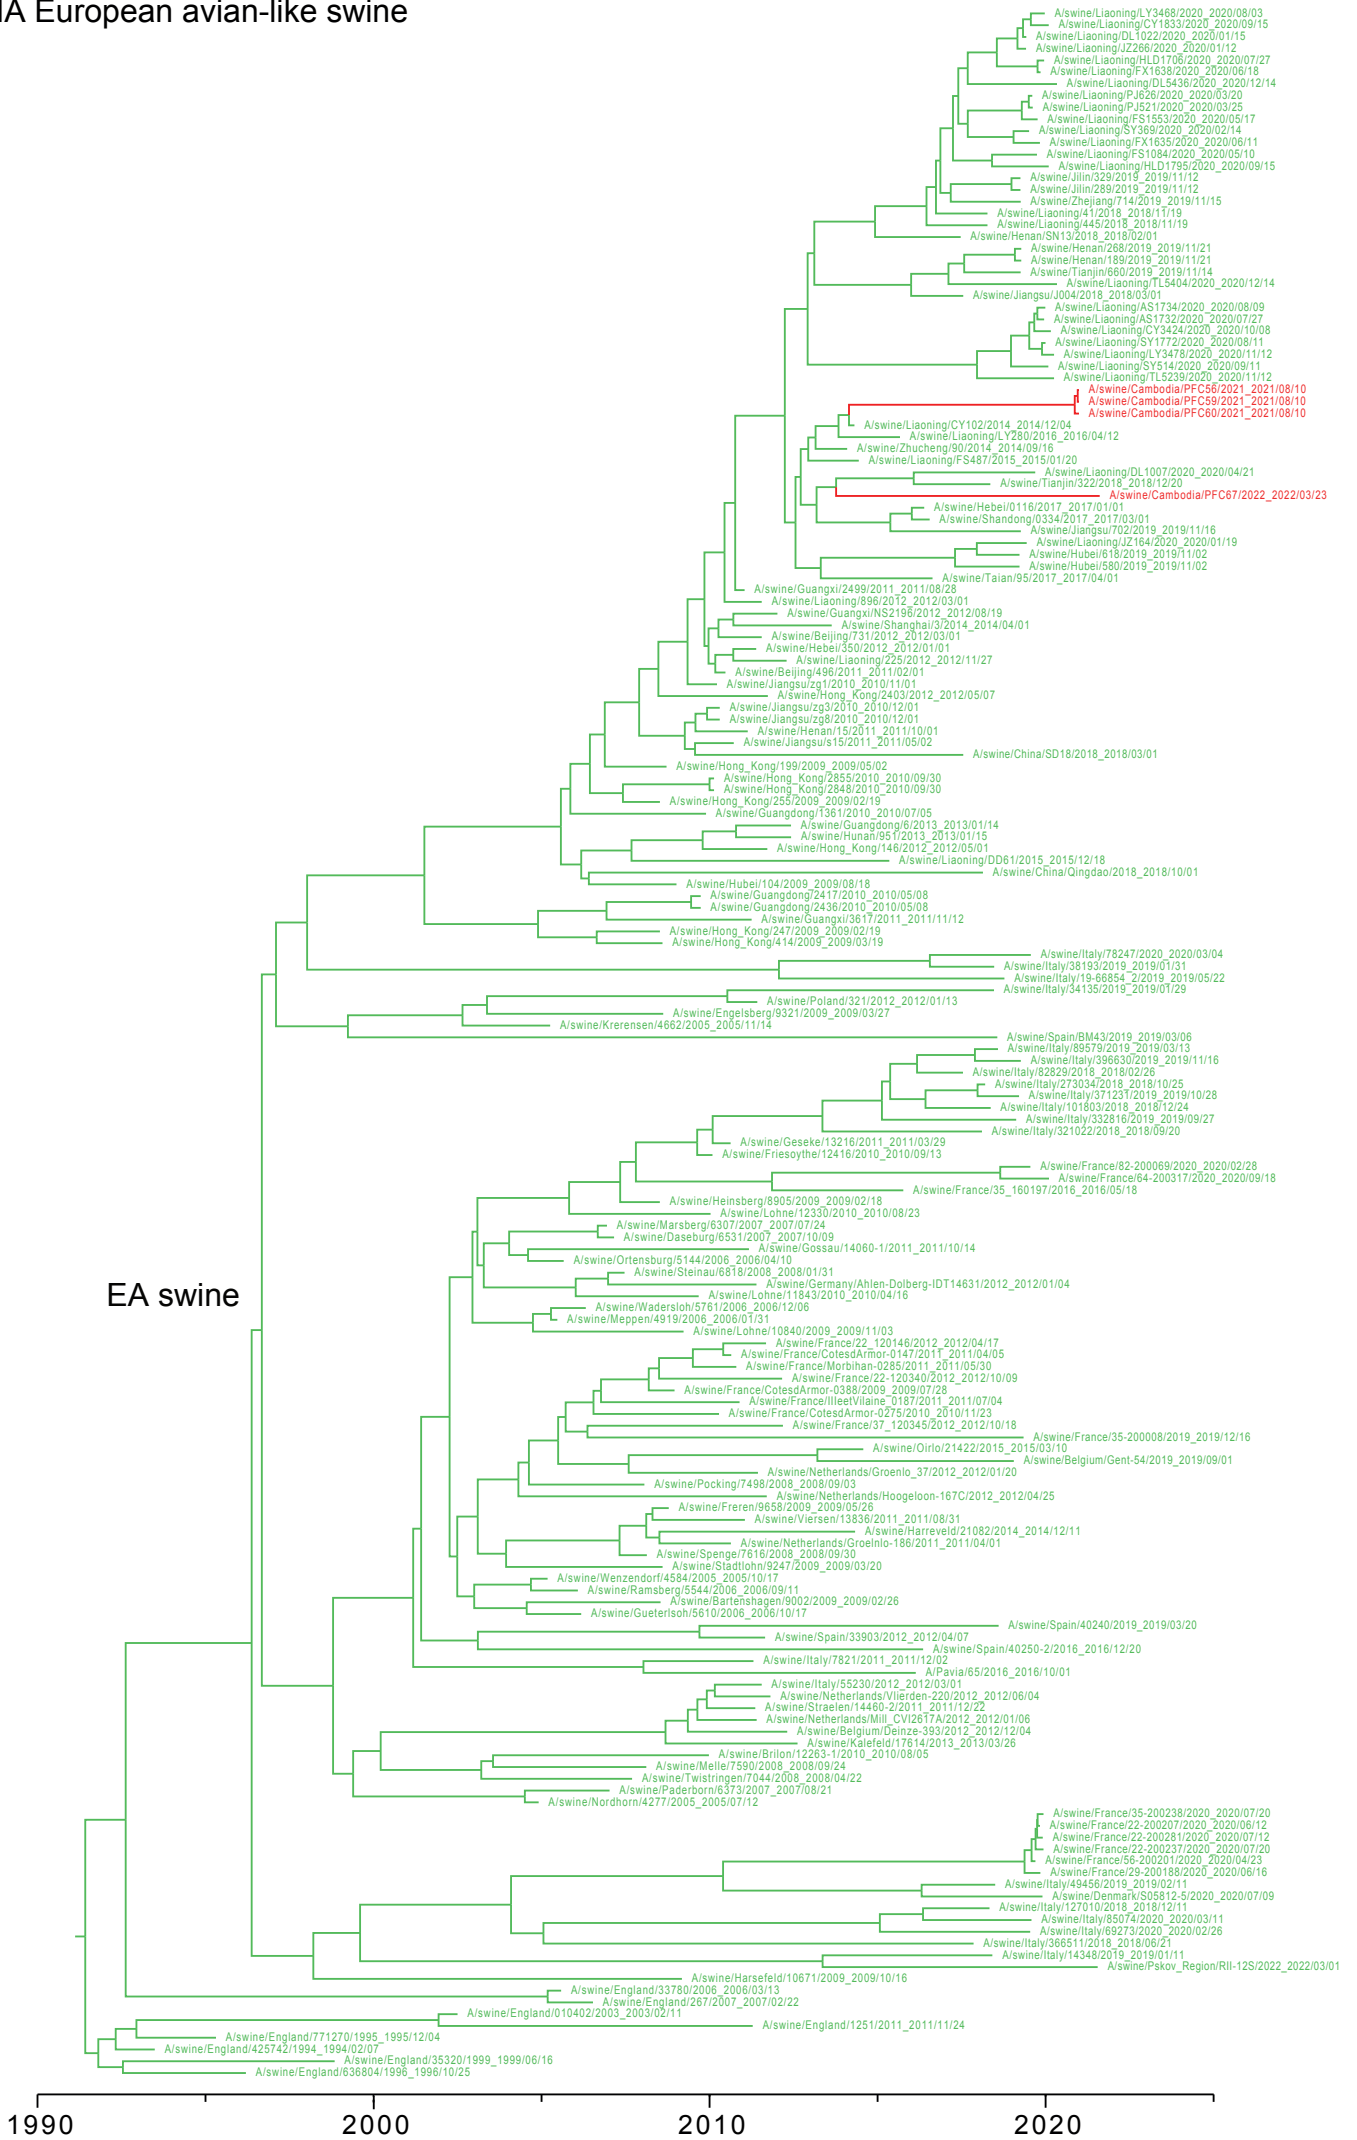

**Fig. S8.** Time scaled phylogeny of the H1-HA gene of European avian-like swine lineage. Red branches denote swine sequences generated in this study.

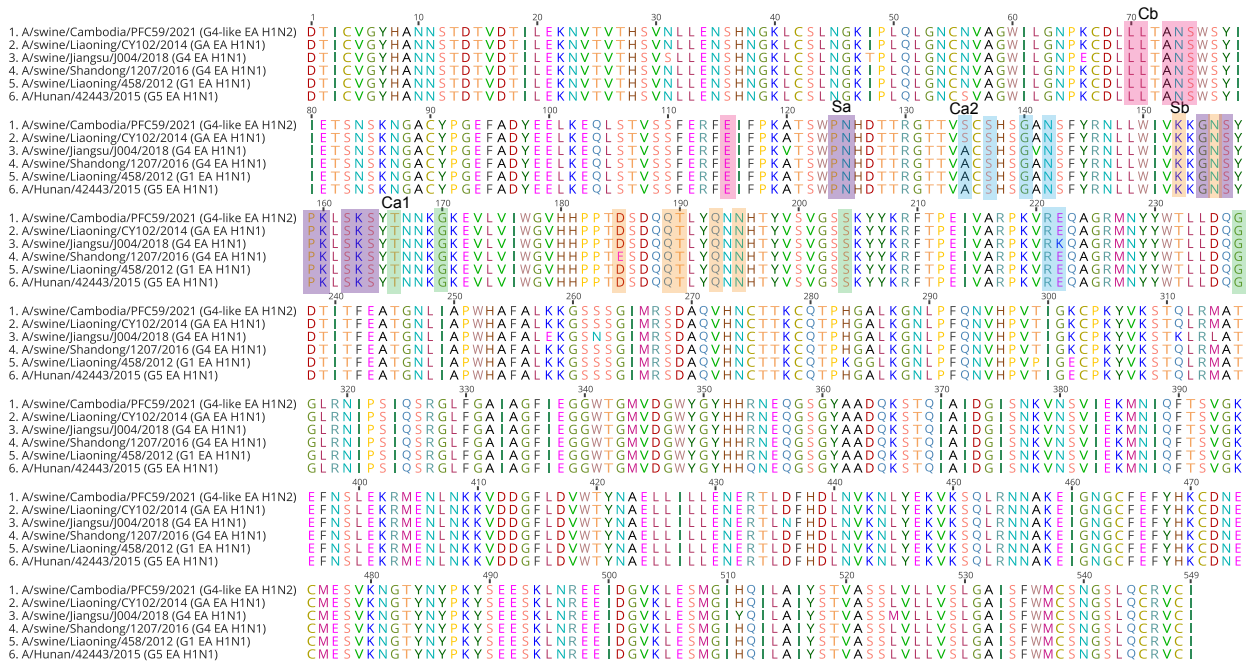

**Fig. S9.** Alignment of the full-length HA amino acid sequences of Cambodian EA H1N2 subtype and other representatives of European avian-like swine lineages. The highlighted amino acid sequences represent five antigenic sites: Ca1, Ca2, Cb, Sa and Sb.

a) European avian-like H1N2 swine

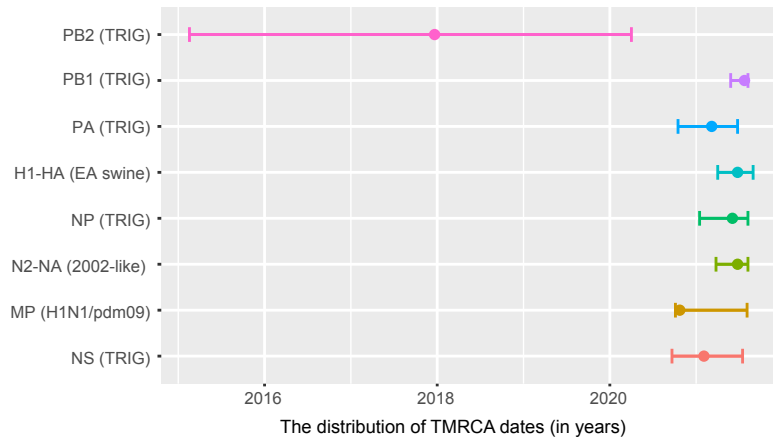

b) swine H1 and H3 lineages

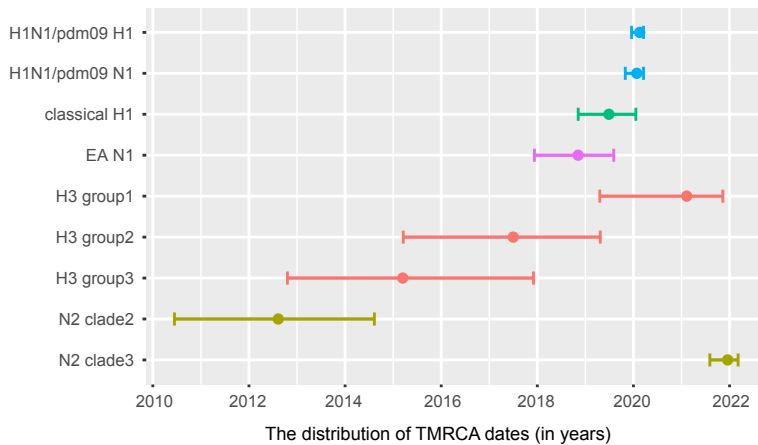

**Fig. S10.** The estimated time of the most recent common ancestors (TMRCA) of different swIAV lineages from pigs in Cambodia. (a) The distribution of TMRCA dates of the Cambodian EA-swine lineage. Lineage name in brackets represent lineage designation. (b) The distribution of TMRCA dates of Cambodian H1, N1, H3 and N2 swine influenza lineages.

a) H1N1/pdm09 (N1-NA)

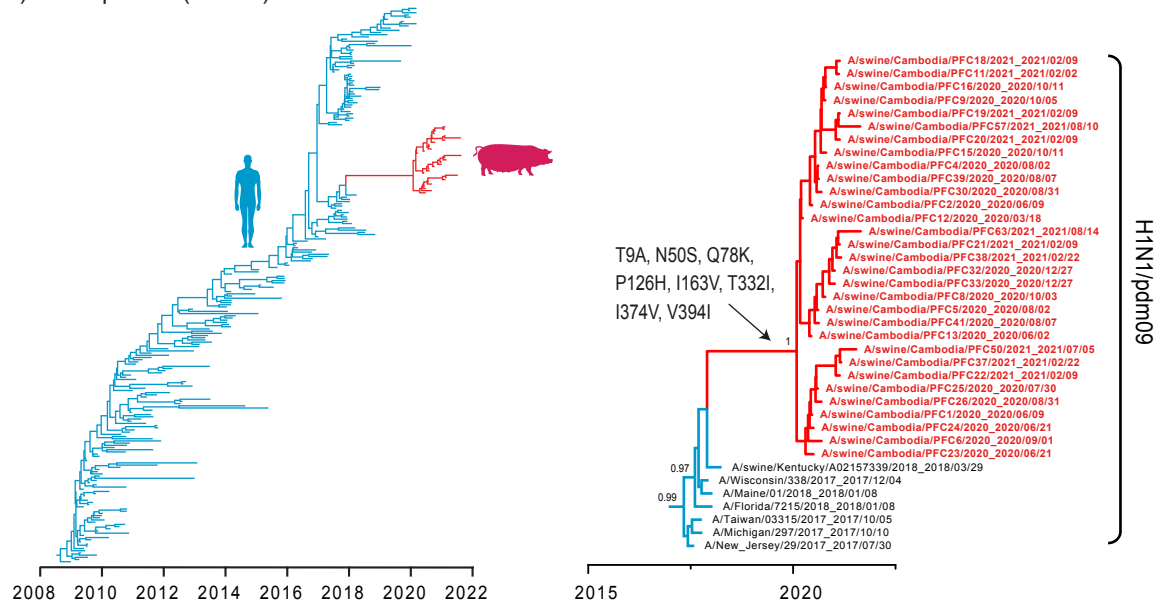

b) European avian-like H1N1 swine (N1-NA)

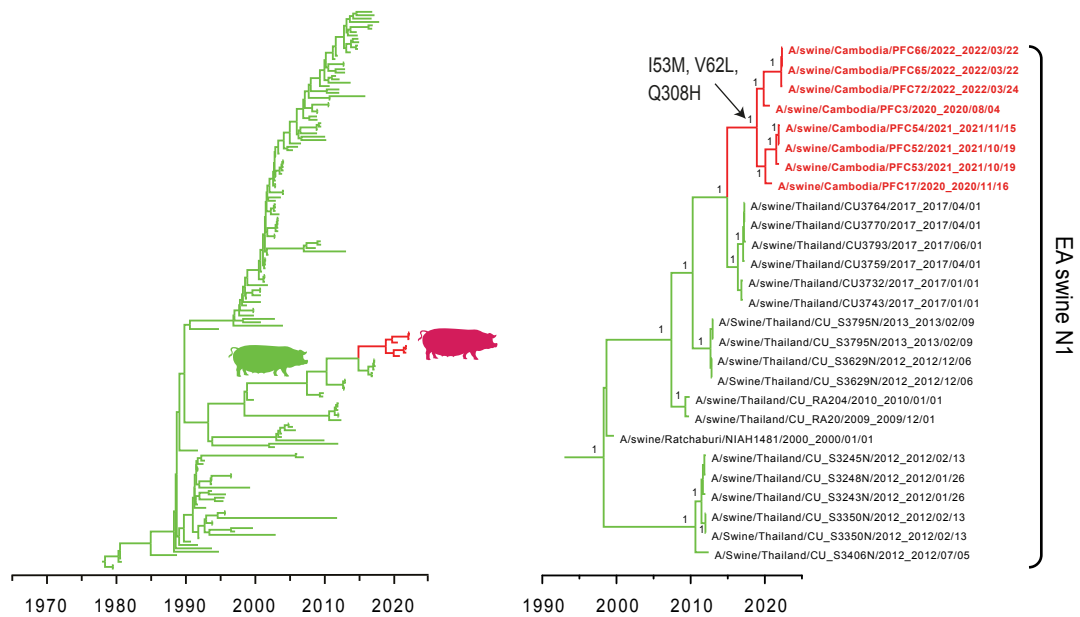

**Fig. S11.** Time scaled phylogenies of N1-NA genes. (a) human H1N1/pdm09 lineage. (b) European avian-like swine lineage. Red branches denote swine sequences generated in this study. Amino acid substitutions are indicated at the nodes of Cambodian swine influenza lineages. Bayesian posterior probability values ( $\geq 0.95$ ) are shown at major nodes.

PB2

PB2

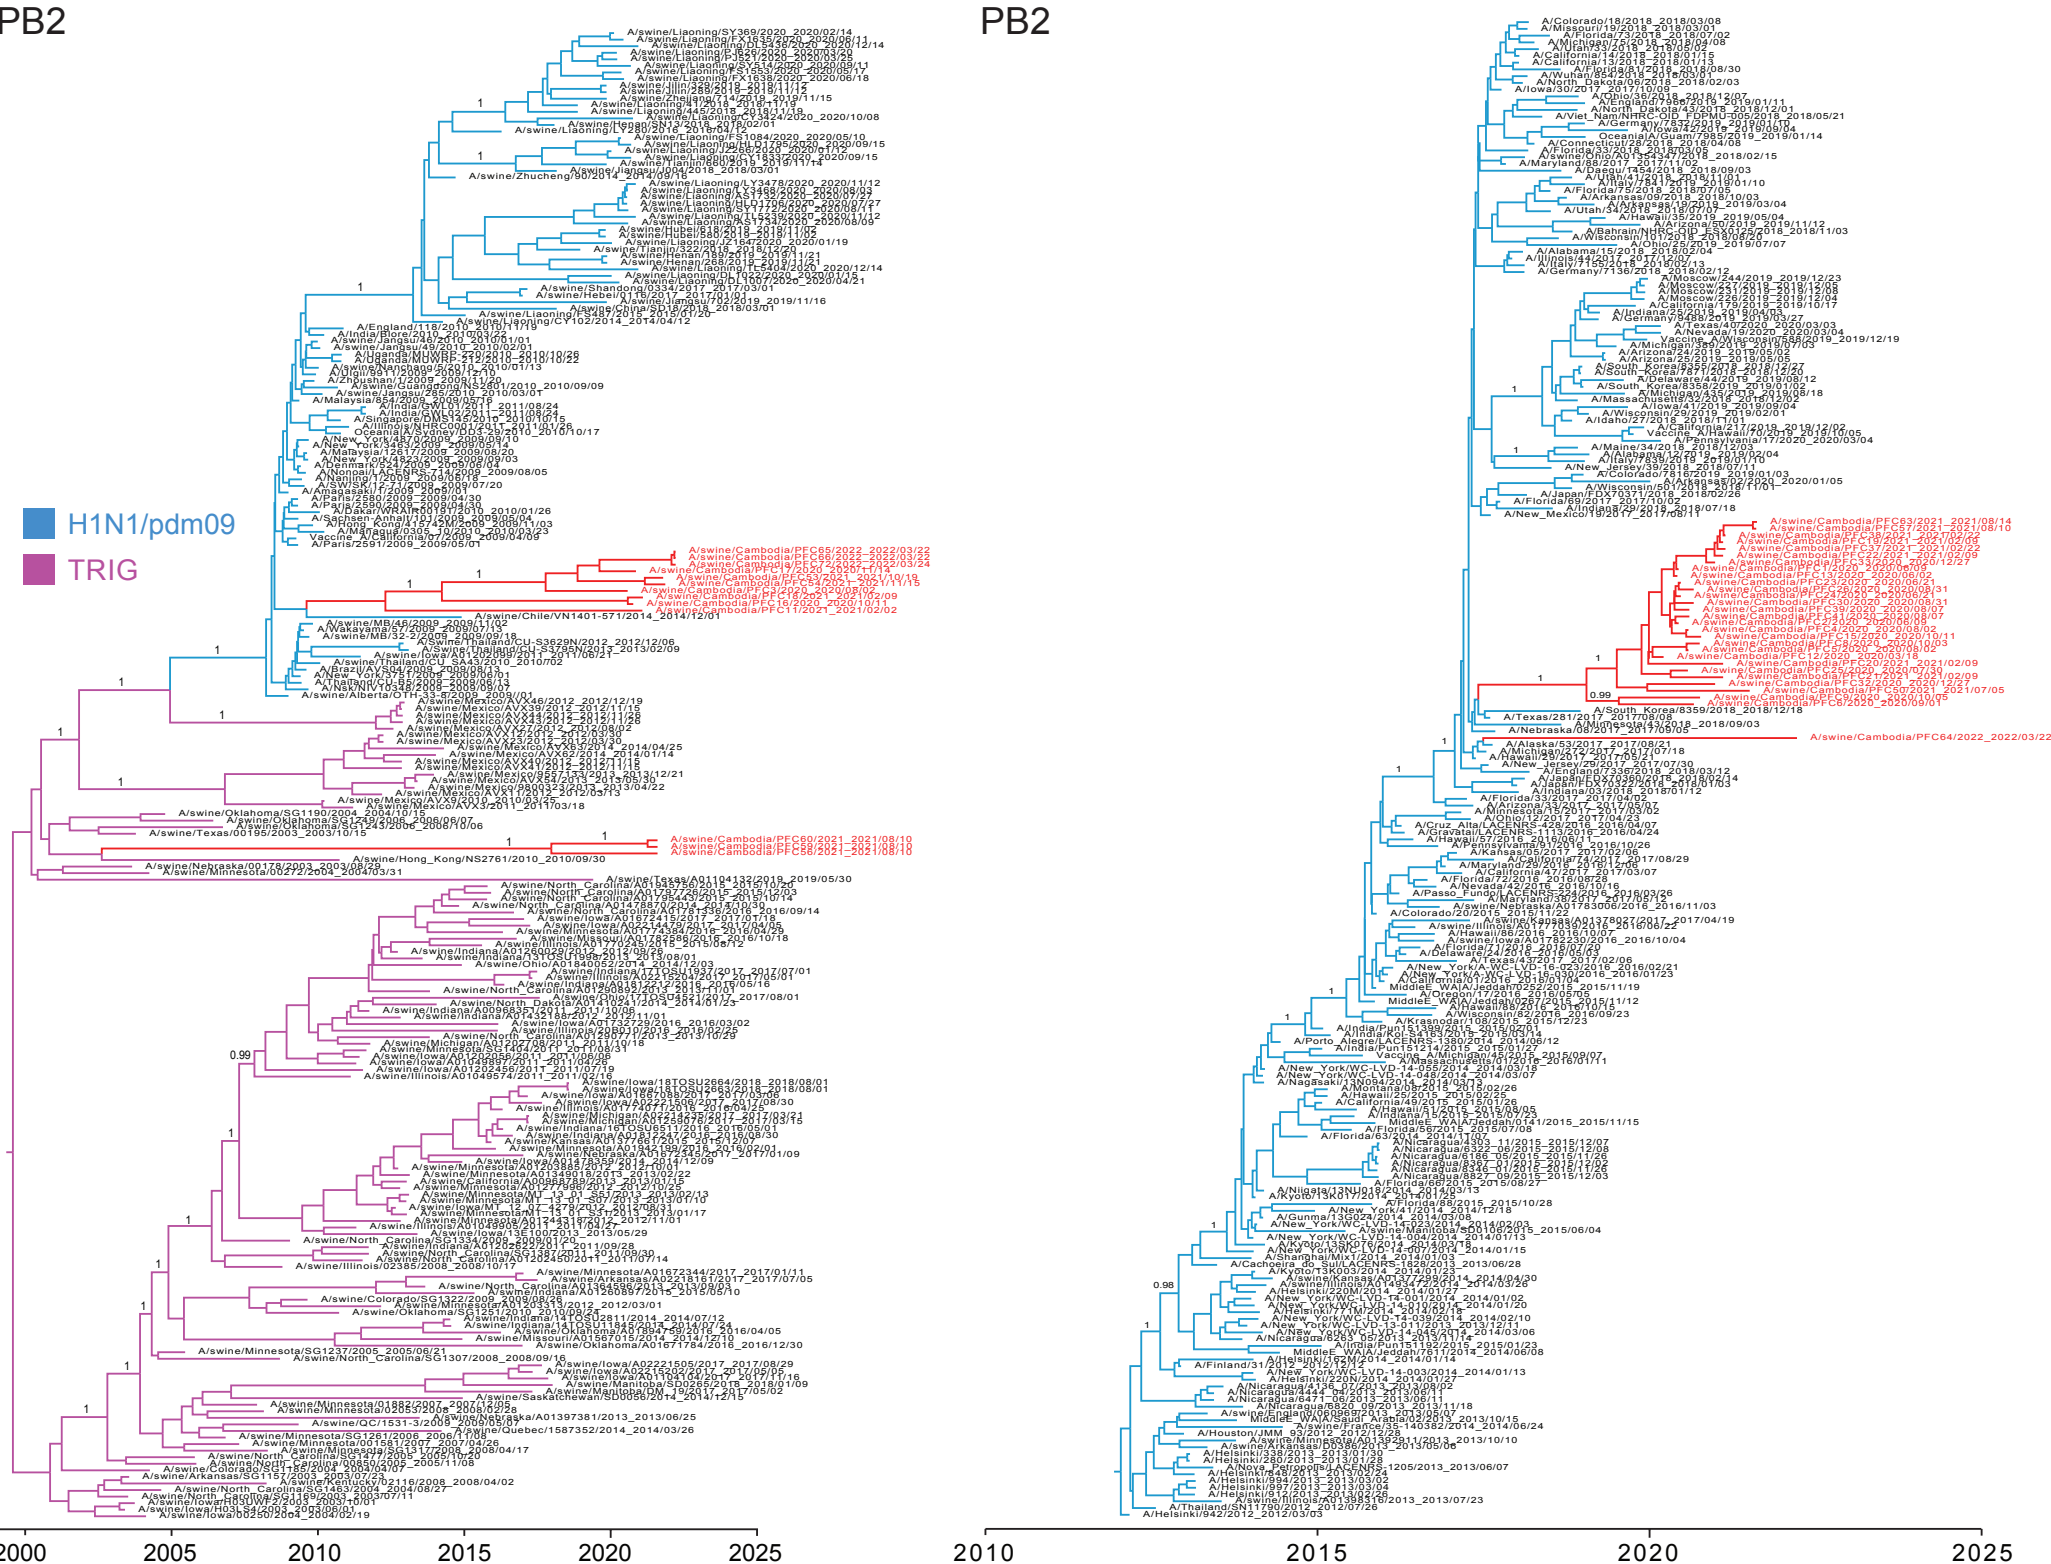

**Fig. S12.** Time scaled phylogenies of the PB2 gene of human and swine influenza viruses. The maximum clade credibility tree (MCC) on the right indicates swIAV sequences from Cambodian pigs are derived from H1N1/pdm09 viruses, and their closely related viruses. The MCC on the left indicates the origins of swIAV sequences from Cambodian pigs and their closely related viruses. Red branches denote swine sequences generated in this study. Bayesian posterior probability values ( $\geq 0.95$ ) are shown at major nodes.

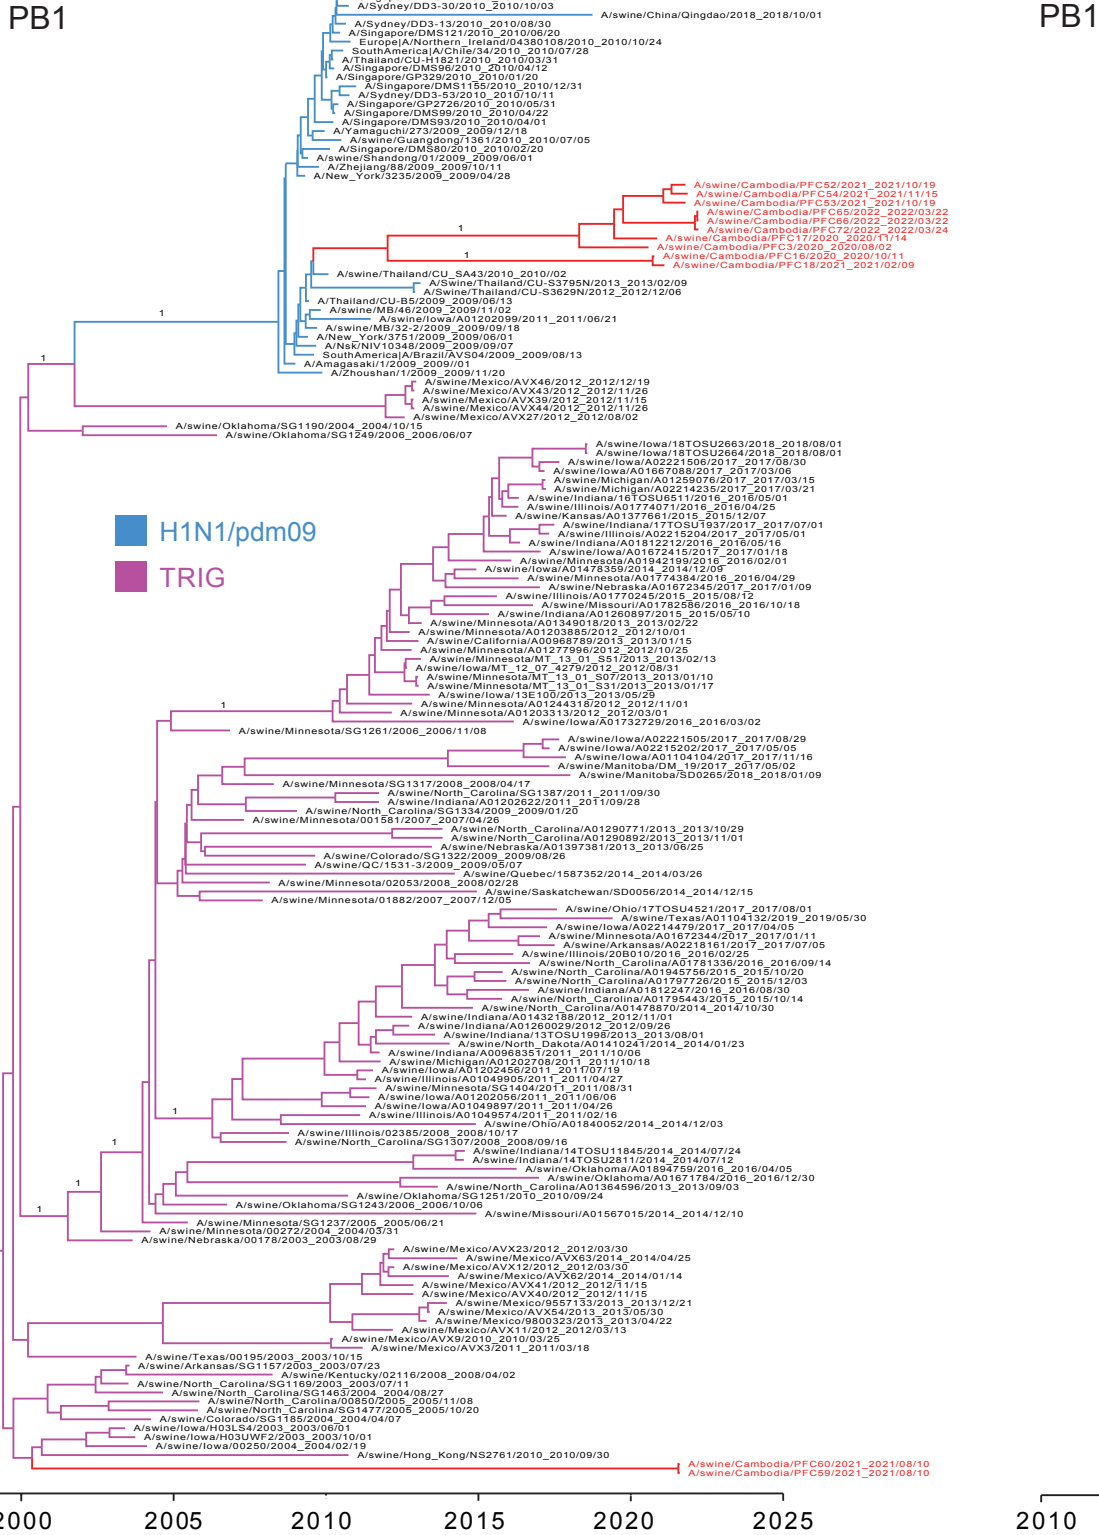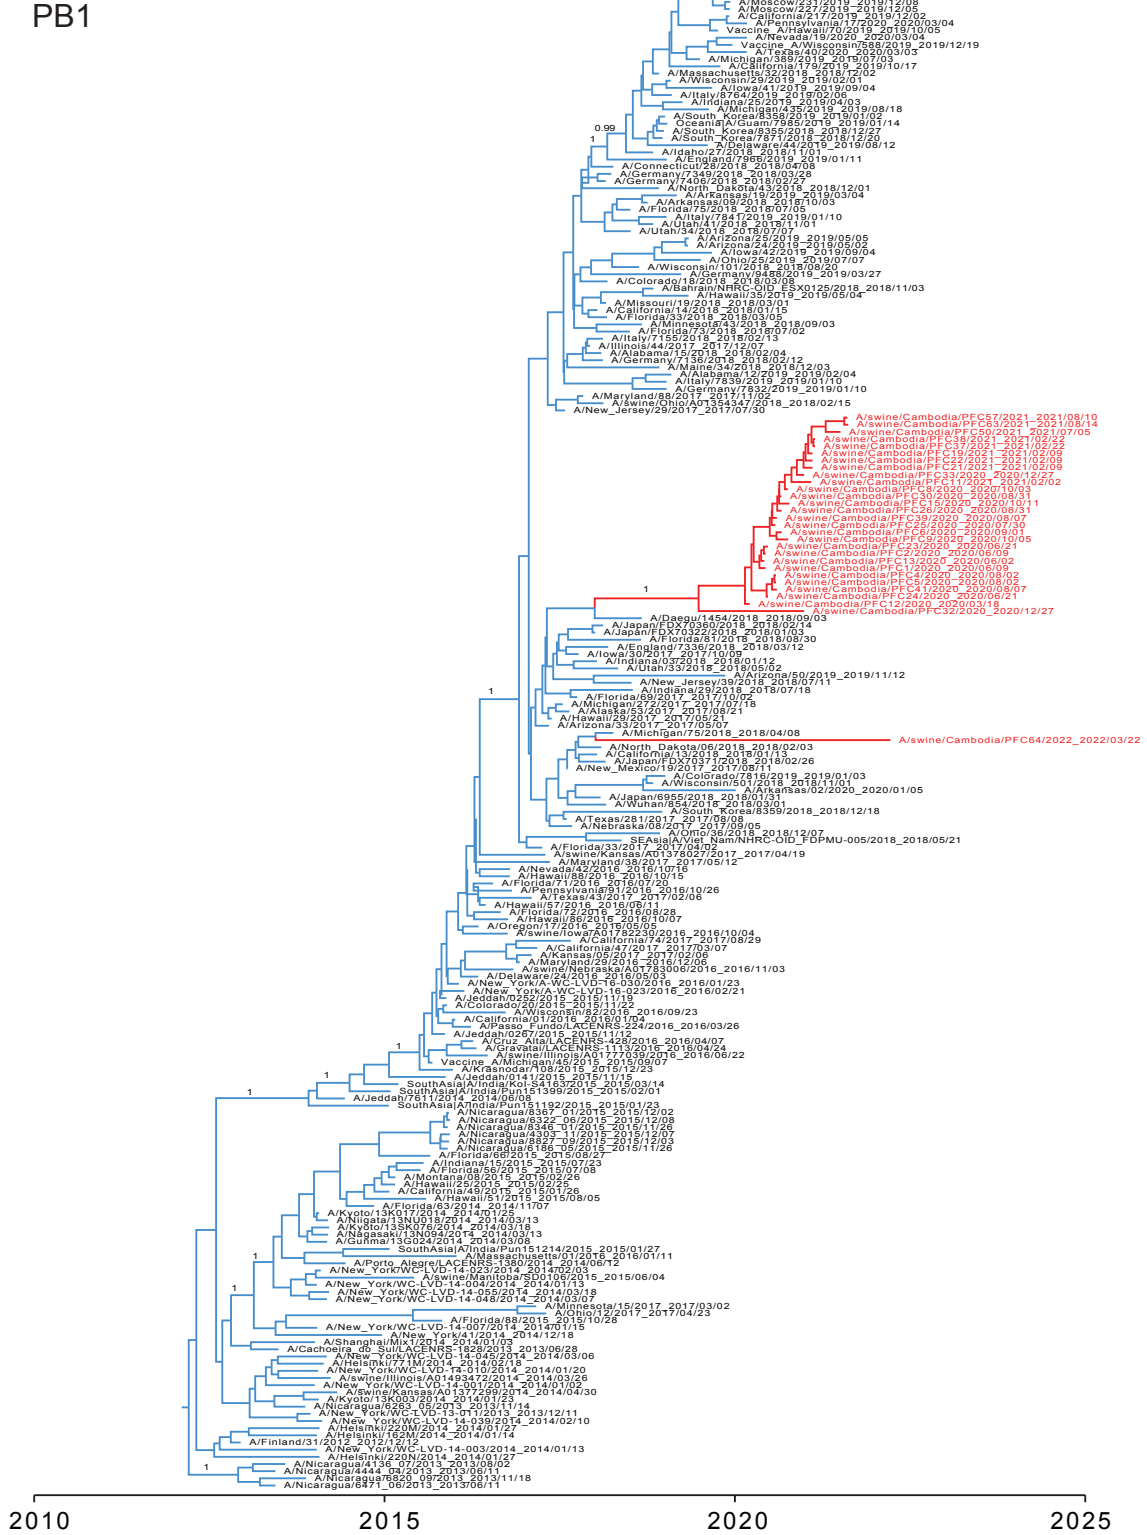

**Fig. S13.** Time scaled phylogenies of the PB1 gene of human and swine influenza viruses. The maximum credible tree (MCC) on the right indicates swIAV sequences from Cambodian pigs are derived from H1N1/pdm09 viruses, and their closely related viruses. The MCC on the left indicates the origins of swIAV sequences from Cambodian pigs and their closely related viruses. Red branches denote swine sequences generated in this study. Bayesian posterior probability values ( $\geq 0.95$ ) are shown at major nodes.

PA

PA

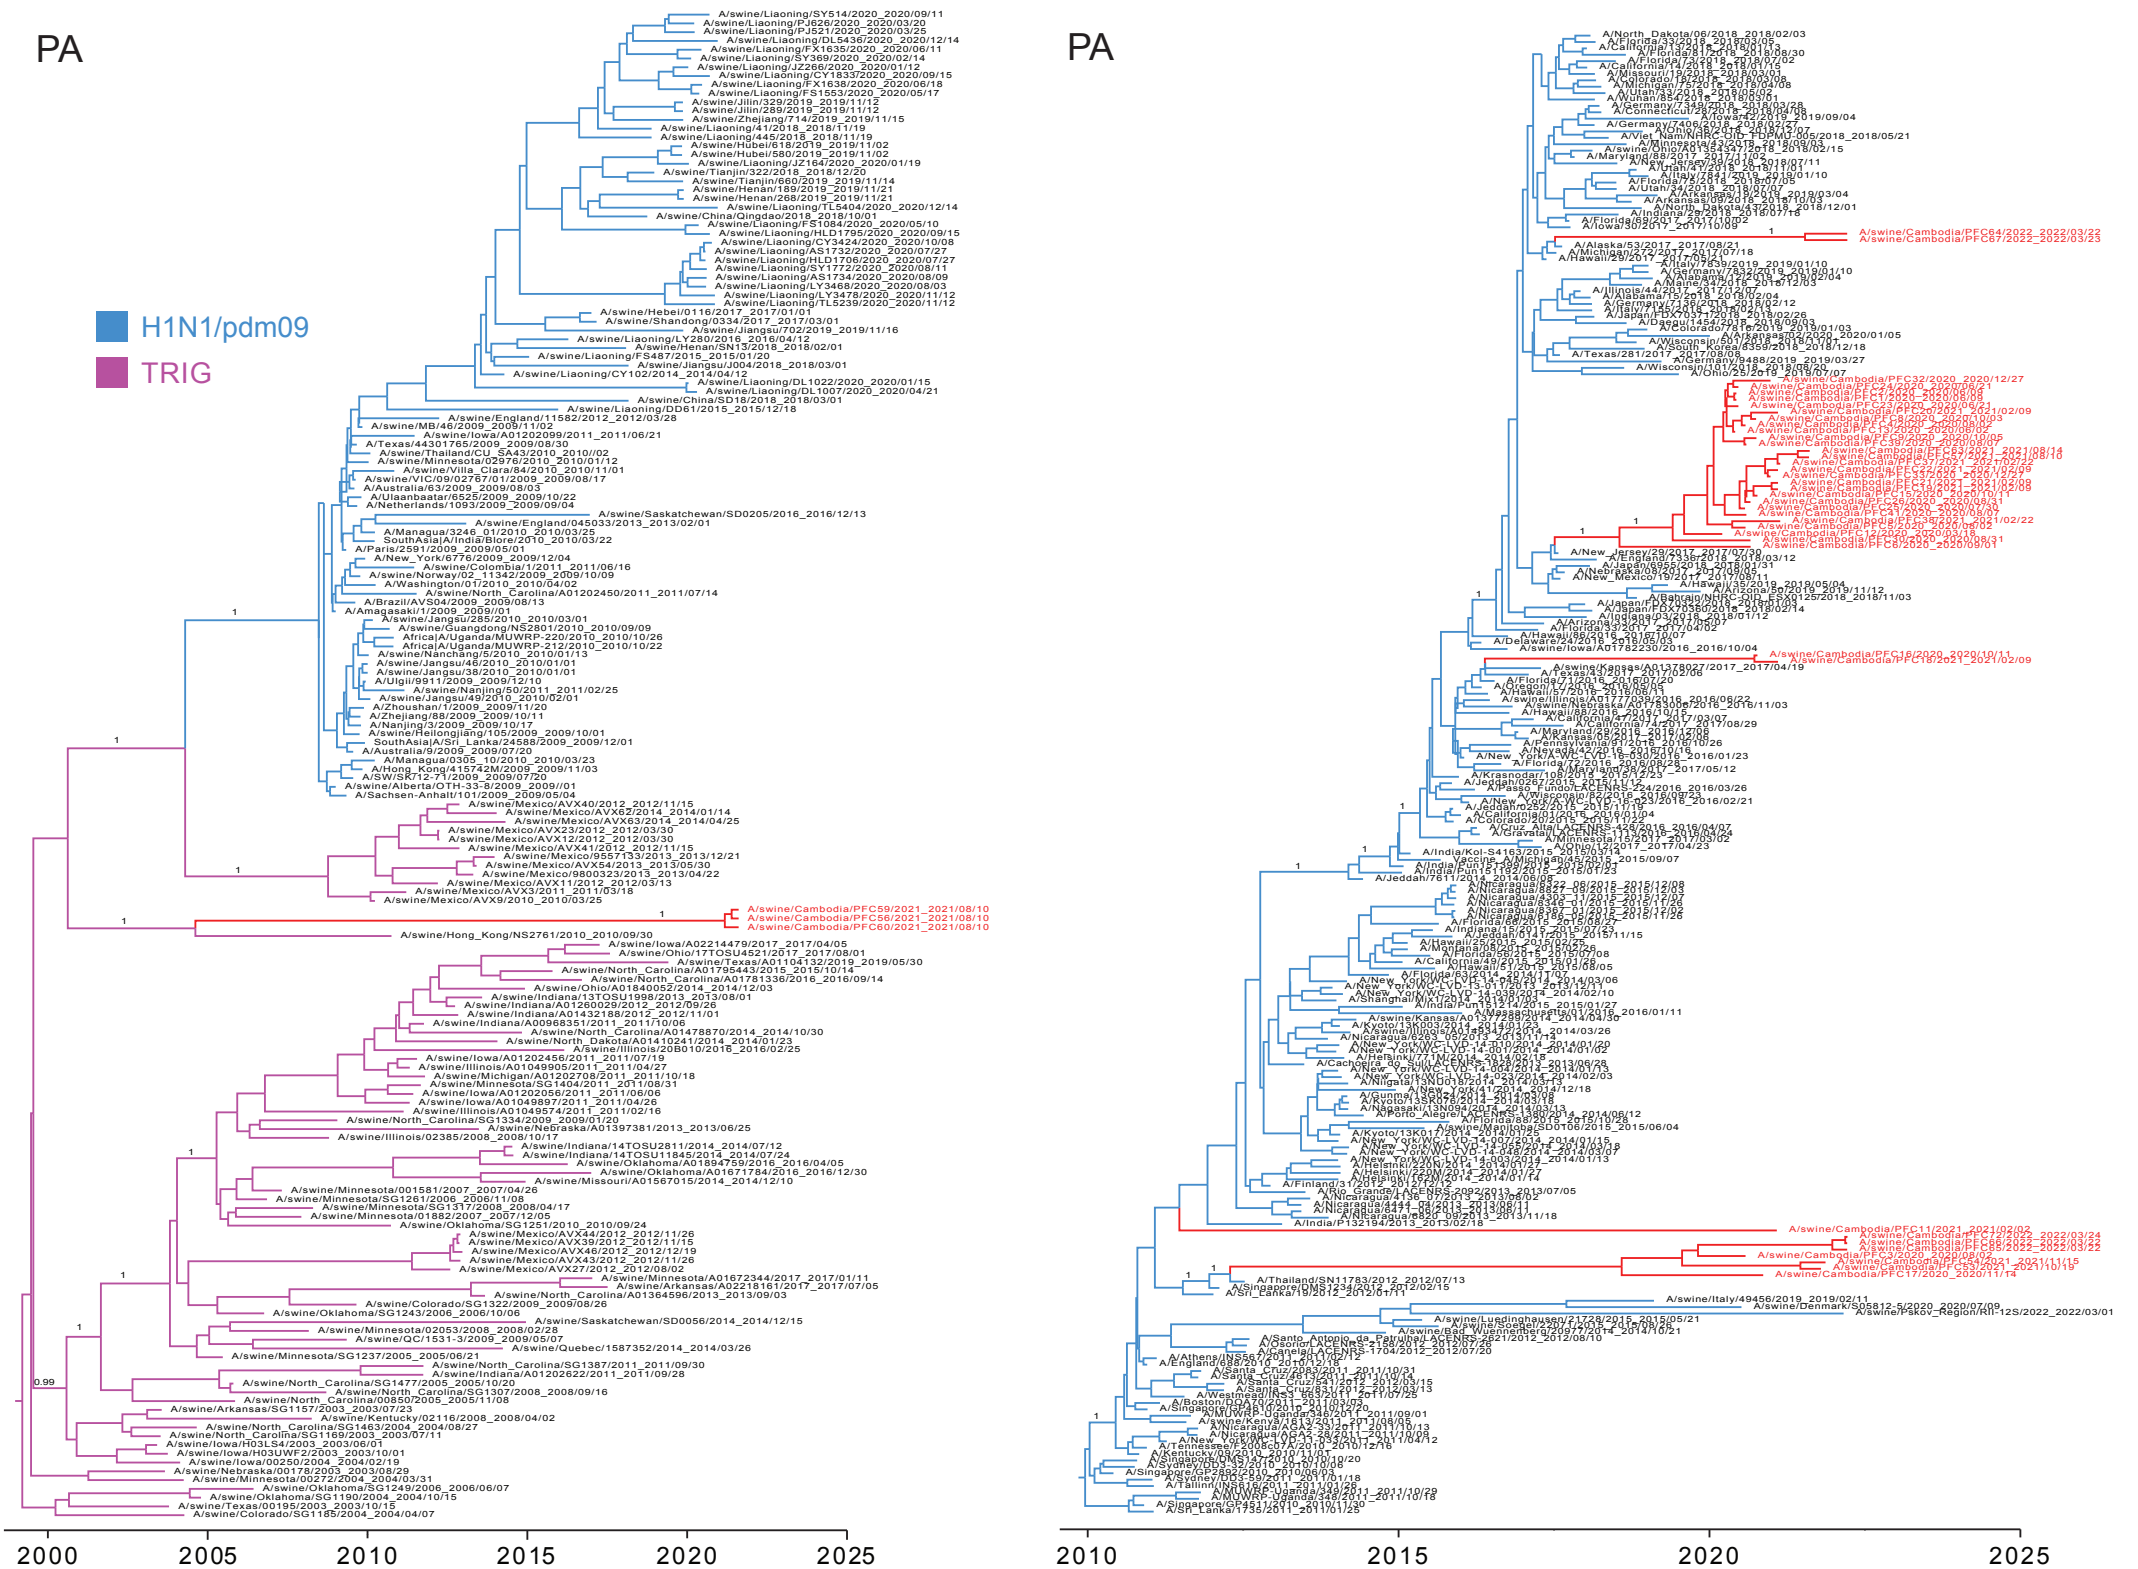

**Fig. S14.** Time scaled phylogenies of the PA gene of human and swine influenza viruses. The maximum clade credibility tree (MCC) on the right indicates swIAV sequences from Cambodian pigs are derived from H1N1/pdm09 viruses, and their closely related viruses. The MCC on the left indicates the origins of swIAV sequences from Cambodian pigs and their closely related viruses. Red branches denote swine sequences generated in this study. Bayesian posterior probability values ( $\geq 0.95$ ) are shown at major nodes.

NP

NP

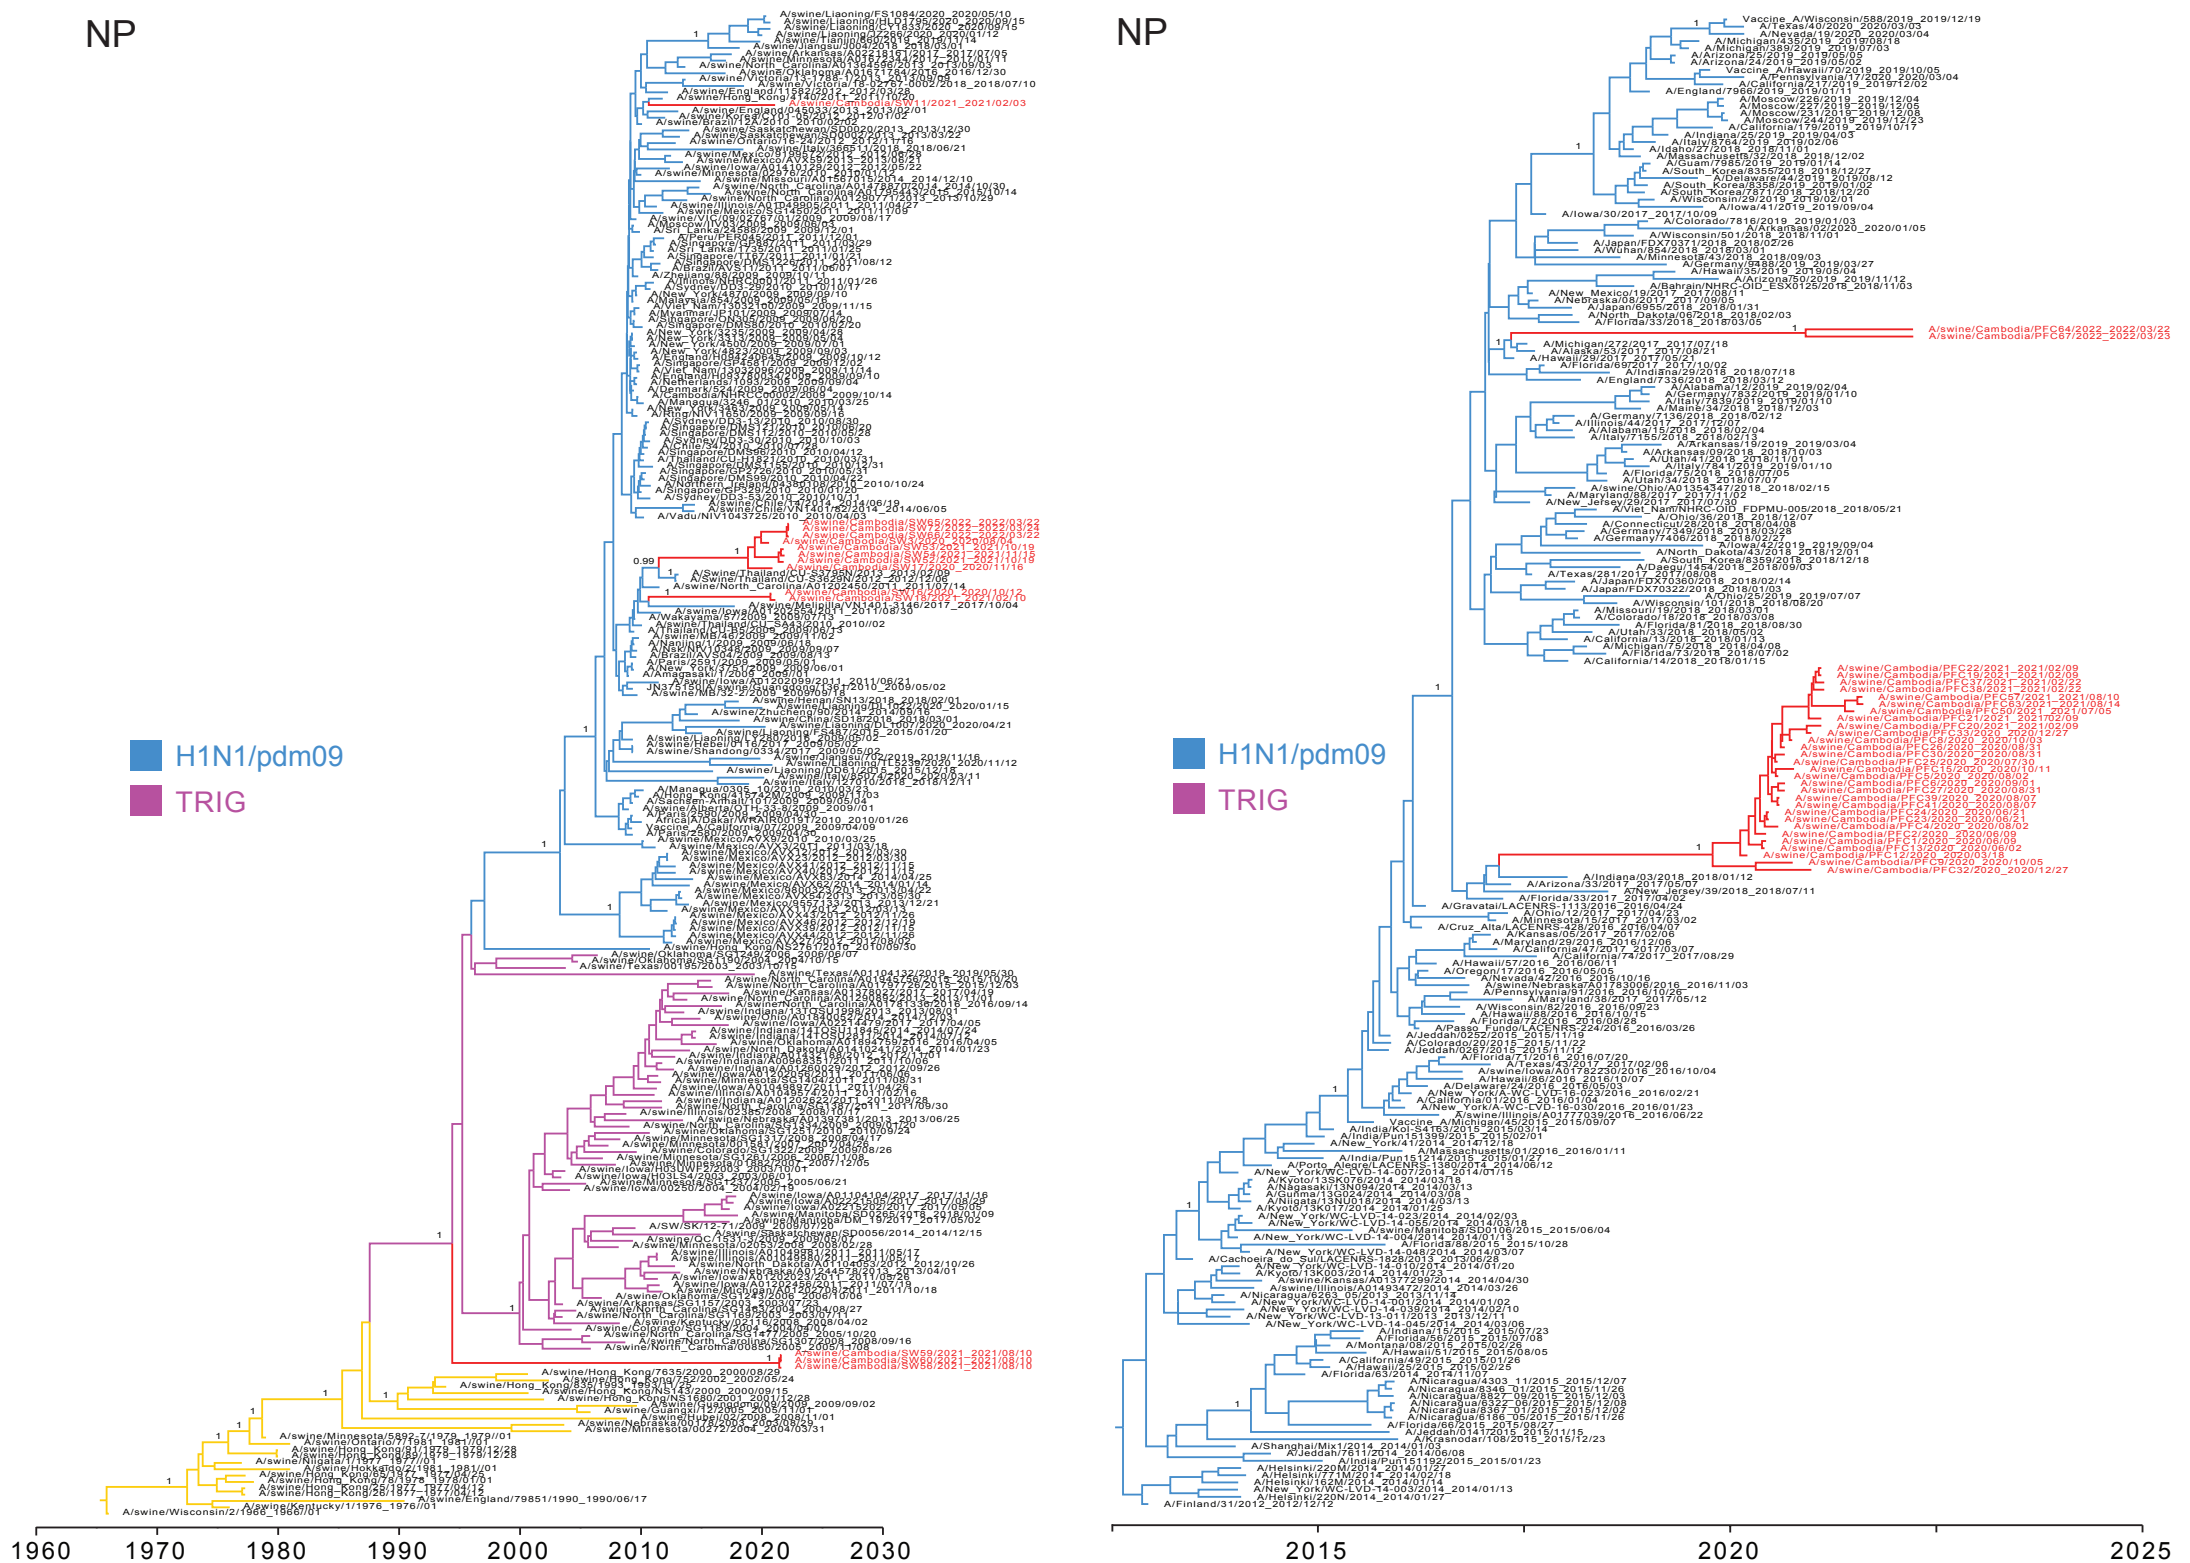

**Fig. S15.** Time scaled phylogenies of the NP gene of human and swine influenza viruses. The maximum clade credibility tree (MCC) on the right indicates swIAV sequences from Cambodian pigs are derived from H1N1/pdm09 viruses, and their closely related viruses. The MCC on the left indicates the origins of swIAV sequences from Cambodian pigs and their closely related viruses. Red branches denote swine sequences generated in this study. Bayesian posterior probability values ( $\geq 0.95$ ) are shown at major nodes.



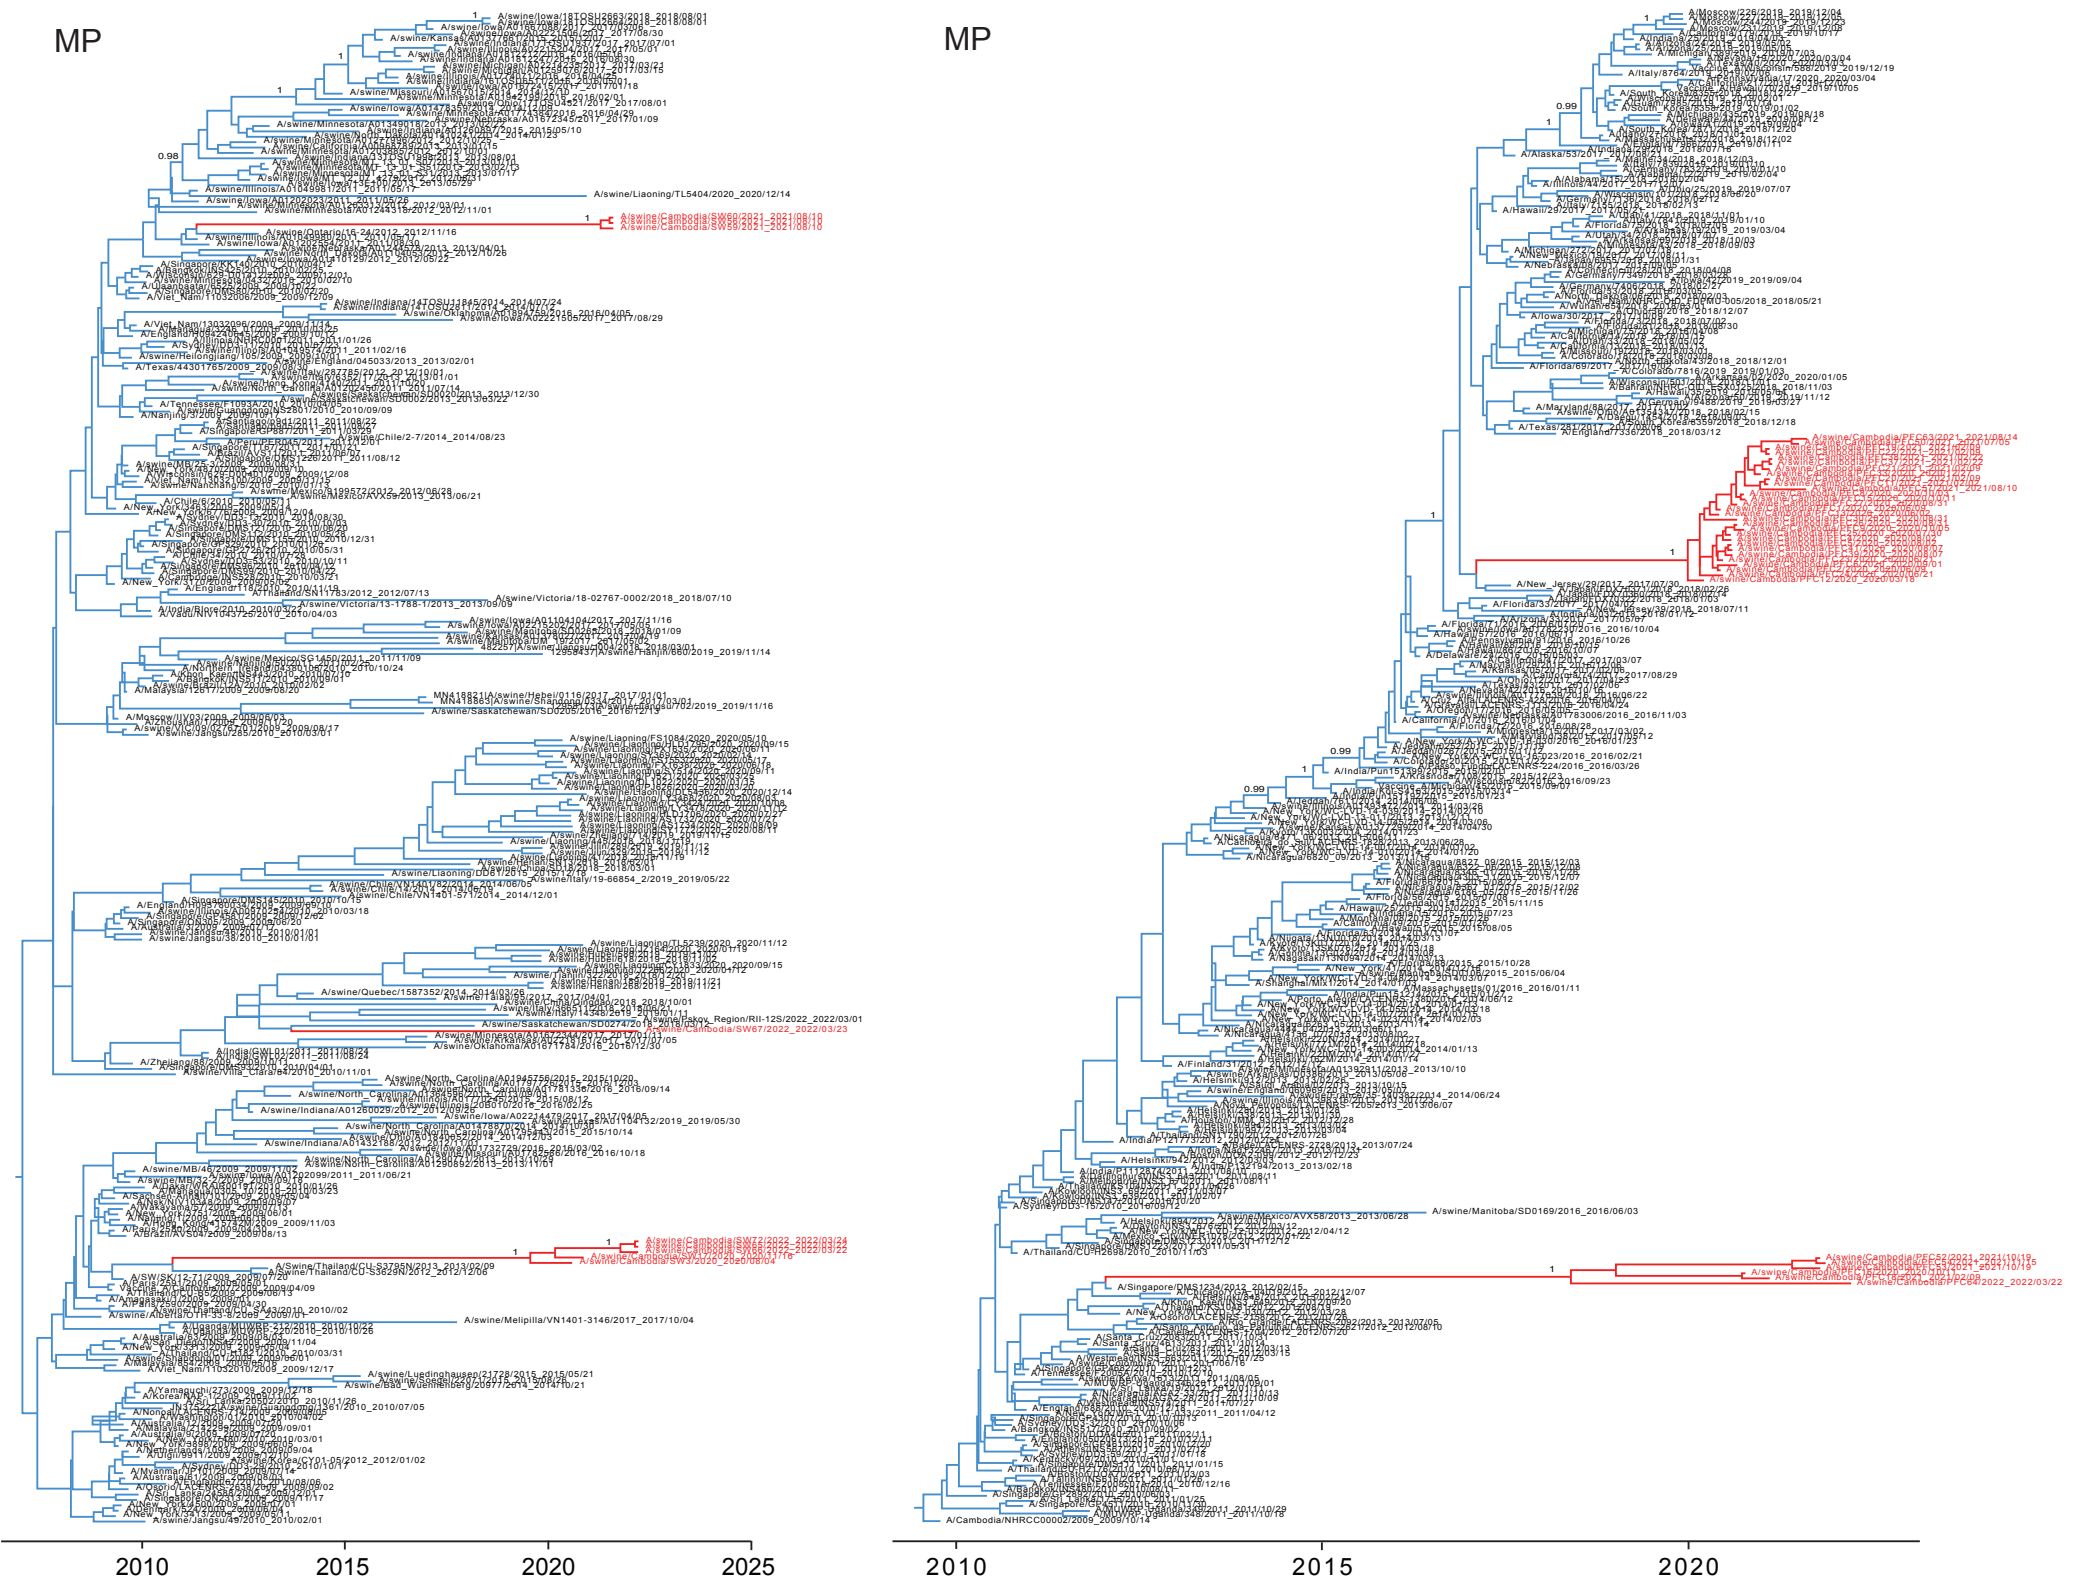

**Fig. S16.** Time scaled phylogenies of the MP gene of human and swine influenza viruses. The maximum clade credibility trees (MCC) indicate swIAV sequences from Cambodian pigs are derived from H1N1/pdm09 viruses, and their closely related viruses. Red branches denote swine sequences generated in this study. Bayesian posterior probability values ( $\geq 0.95$ ) are shown at major nodes.

NS

NS

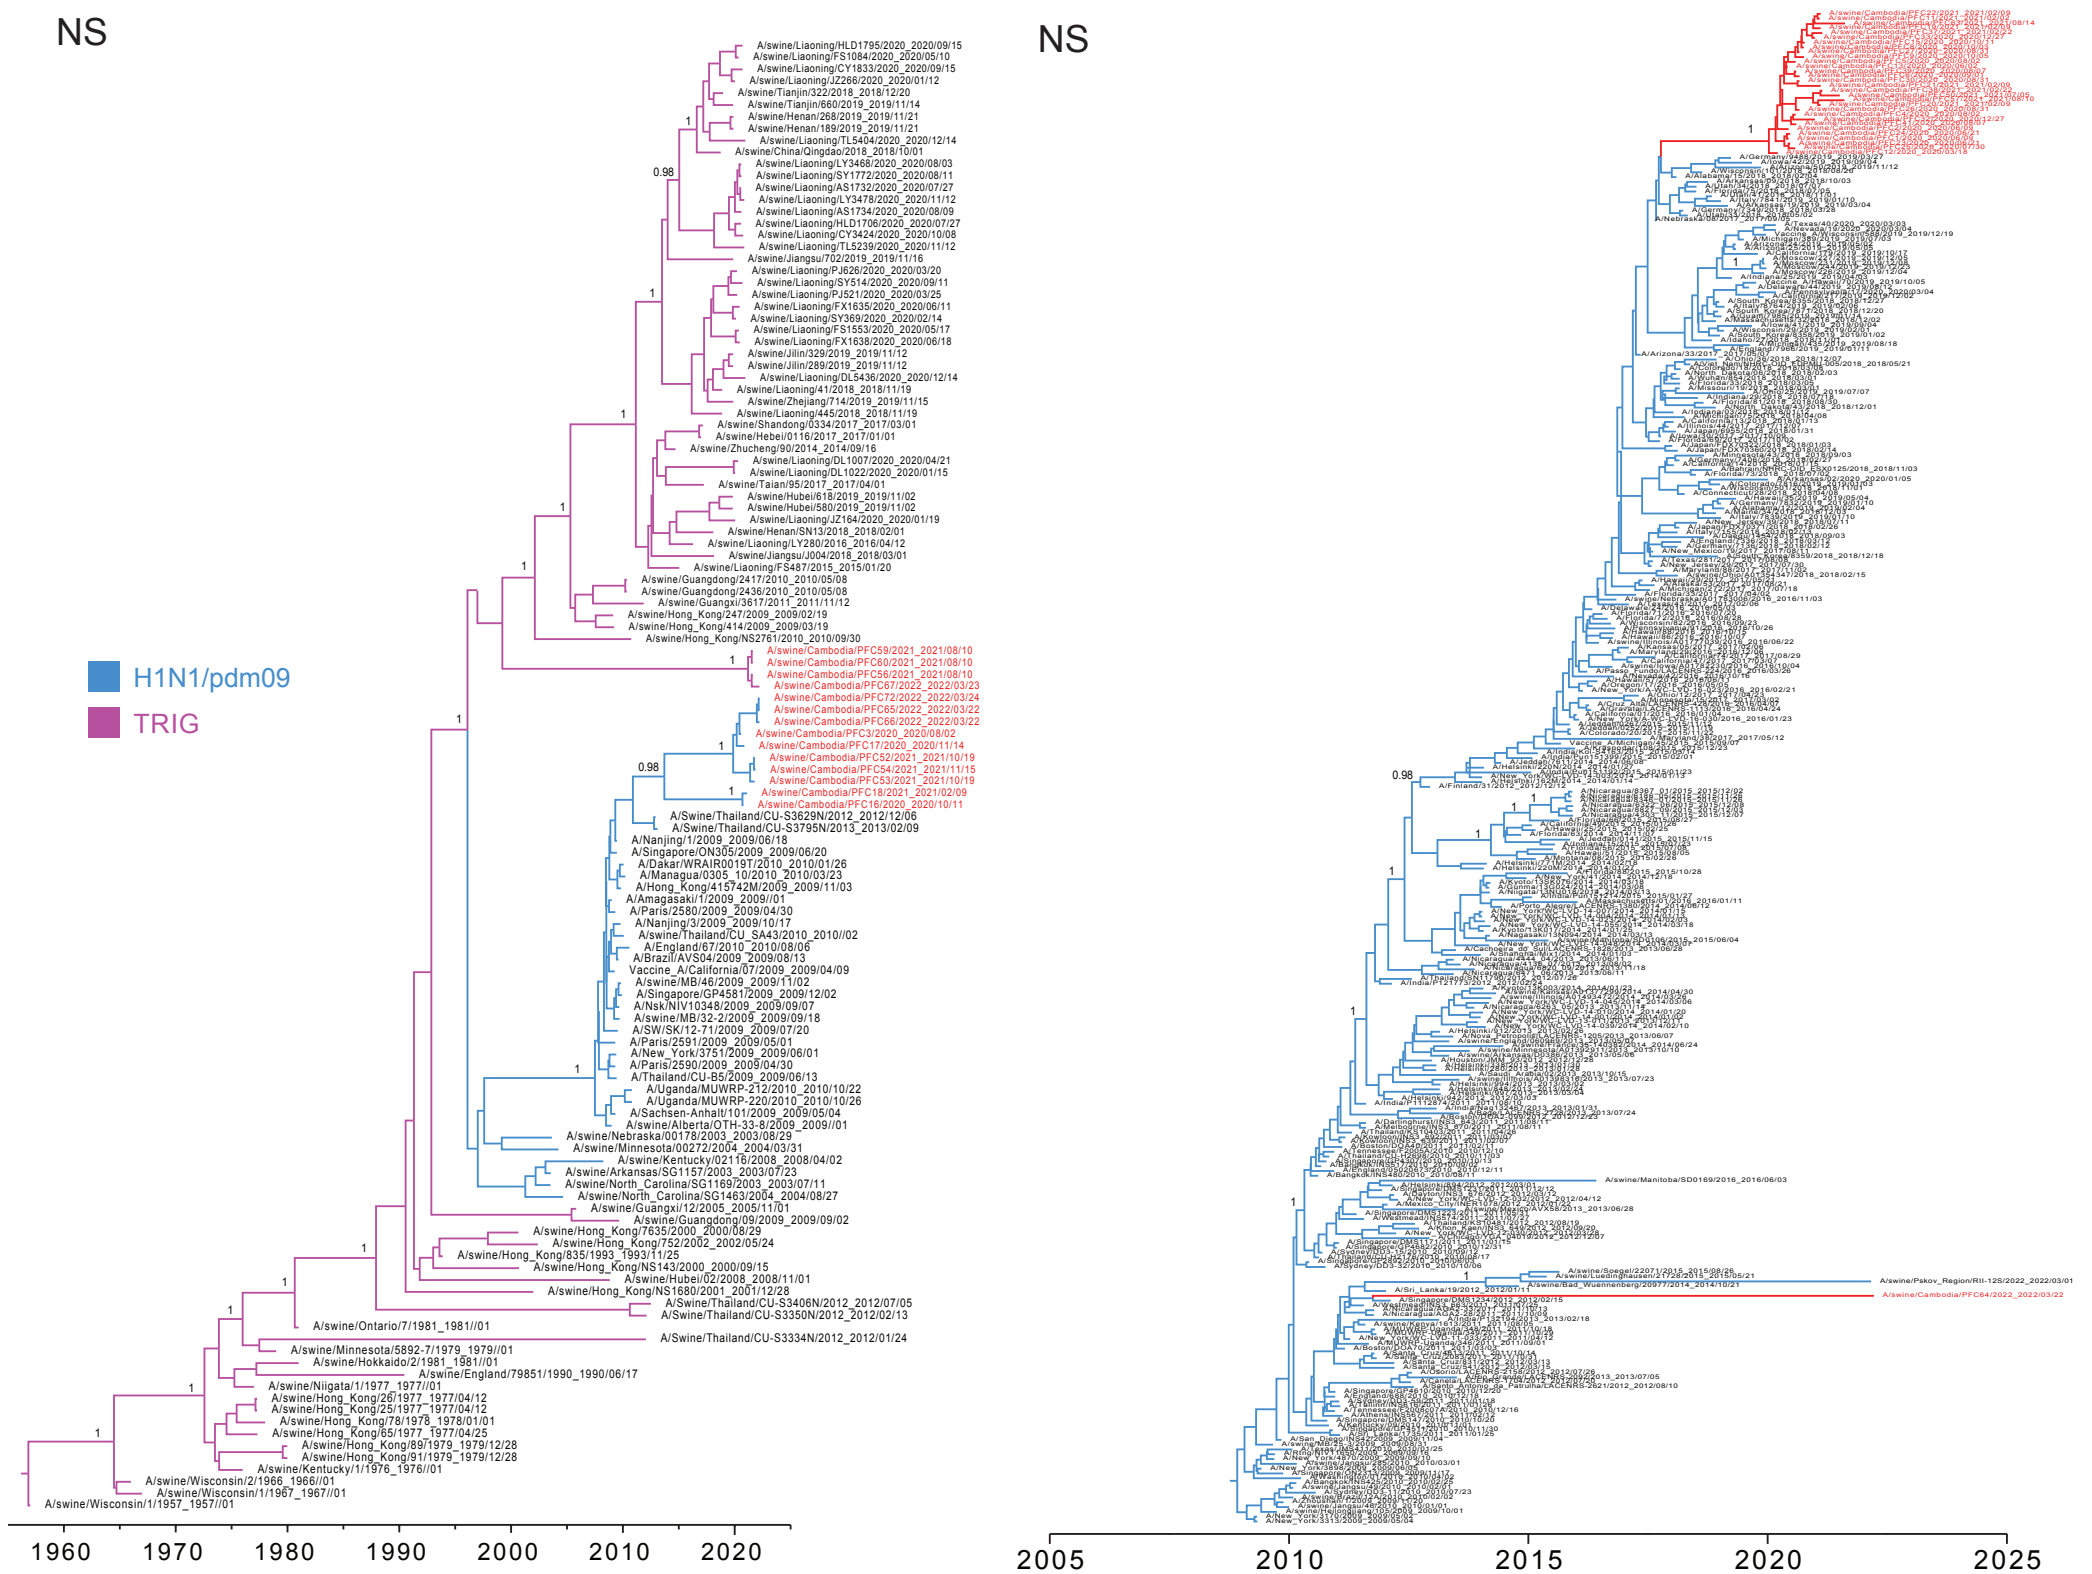

**Fig. S17** Time scaled phylogenies of the NS gene of human and swine influenza viruses. The maximum clade credibility tree (MCC) on the right indicates swIAV sequences from Cambodian pigs are derived from H1N1/pdm09 viruses, and their closely related viruses. The MCC on the left indicates the origins of swIAV sequences from Cambodian pigs and their closely related viruses. Red branches denote swine sequences generated in this study. Bayesian posterior probability values ( $\geq 0.95$ ) are shown at major nodes.

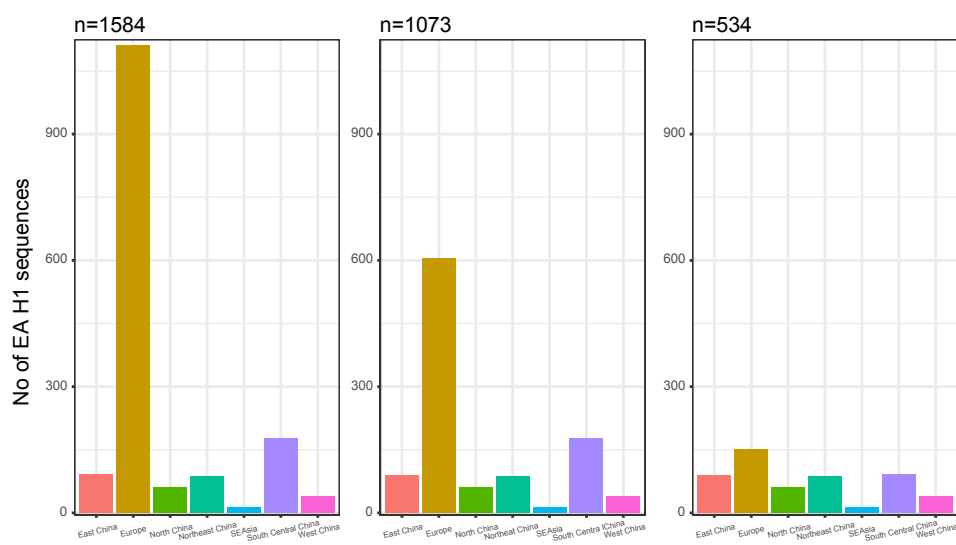

**Fig. S18.** Number of globally available HA-H1 sequences (n=1,584) for European avian-like swine lineages from 2005 to 2022. Two subsampled datasets (n=1,073 and n=534) were used for Bayesian discrete phylogeographic analyses.

(a) Migration support (n=1,073)

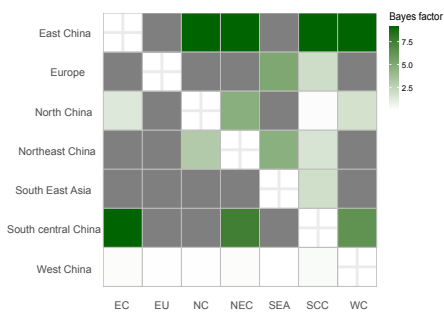

(b) Migration support (n=534)

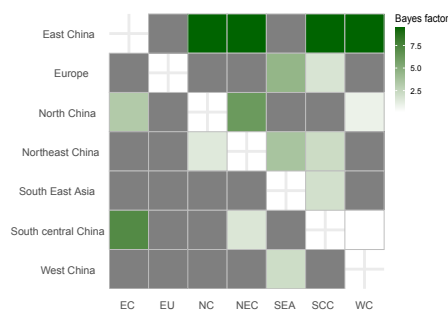

(c) Diffusion pathways (n=534)

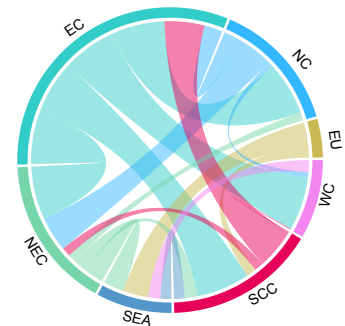

**Fig. S19.** Discrete phylogeographic reconstructions of European avian-like swine lineages. (a) heatmap showing asymmetric migration support matrix between locations, based on 1,073 sequences. (b) heatmap showing asymmetric migration support matrix between locations, based on 534 sequences. (c) Circular diffusion plot between locations, based on 534 sequences.

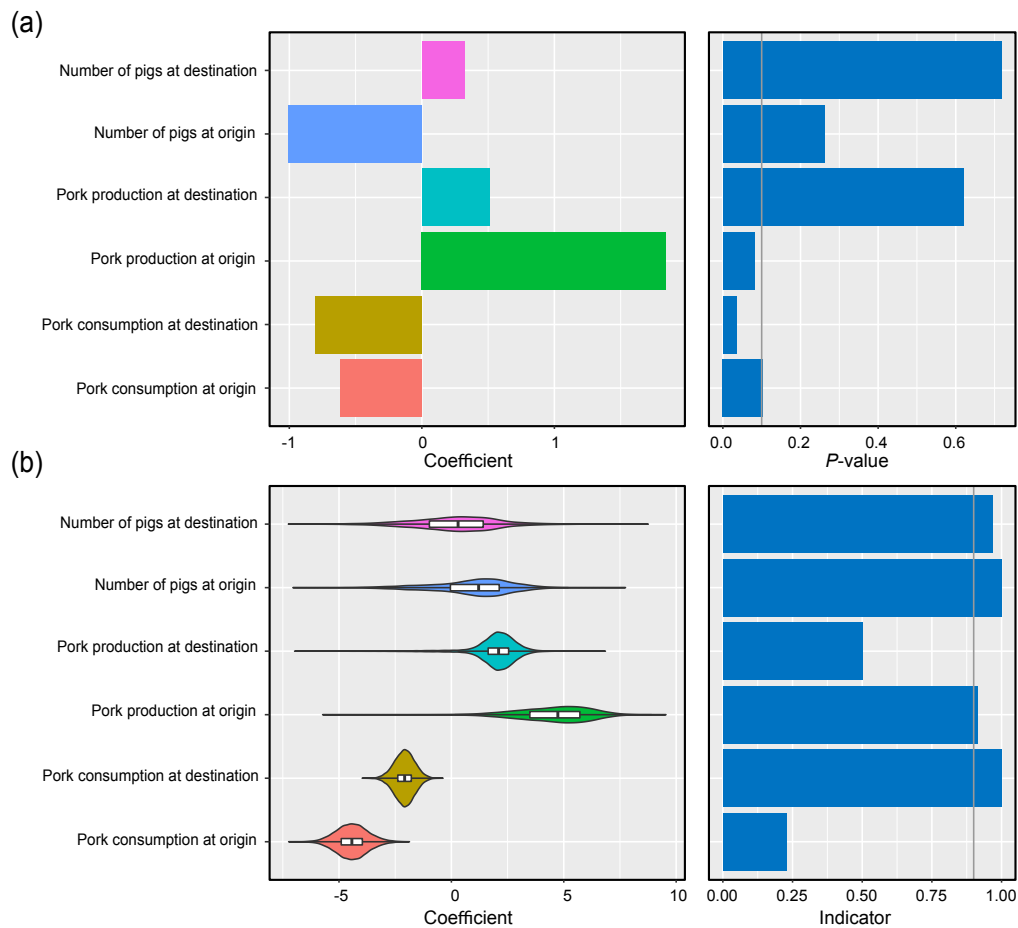

**Fig. S20.** Potential predictors and spatial spread of European avian-like swine lineages. (a) coefficients and support estimated using generalised least squares (GLS) model. Grey vertical line indicates the  $P$ -value of 0.1. (b) coefficients and support estimated using Bayesian generalised linear model (GLM). Grey vertical line indicates the posterior support at 0.9.

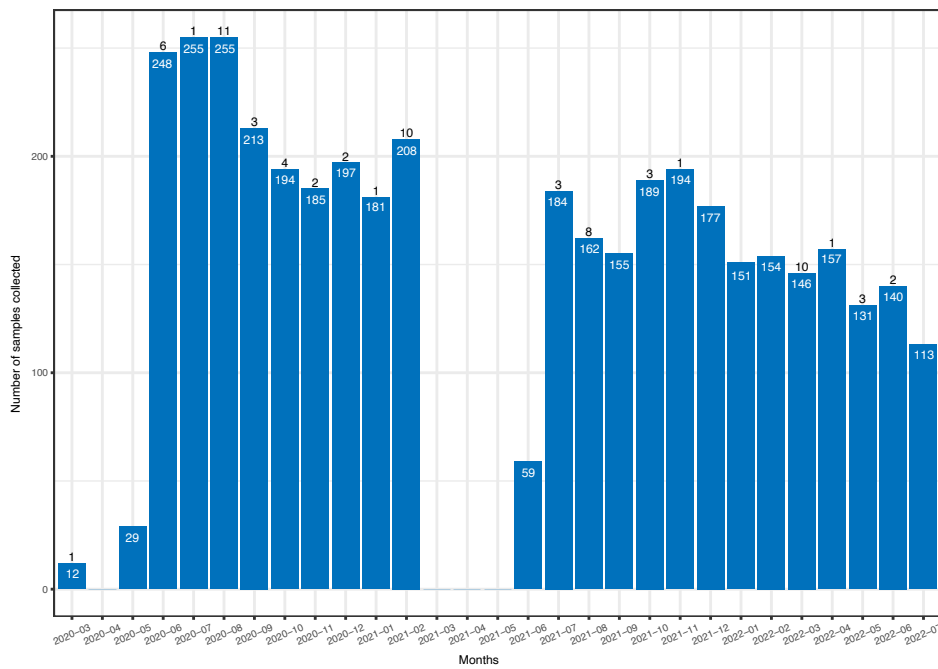

**Fig. S21.** Overview of the number of swab samples collected from pigs in Cambodia. The number above the bars indicate the number of IAV-positive samples by RT-qPCR, and the number below the bars indicate the number of samples collected. Sampling was suspended in April 2020 due to the COVID-19 pandemic and between April 2021 to May 2021 due to government imposed lockdowns.

**Table S1. Sequenced swine influenza A strains collected from pig slaughterhouses in Cambodia, 2020–2022.**

| <b>Strains</b>                           | <b>Province</b> | <b>District</b> | <b>Collection Date</b> |
|------------------------------------------|-----------------|-----------------|------------------------|
| A/swine/Cambodia/PFC1/2020 (H1N1)        | Takeo           | District 1      | 09 June 2020           |
| A/swine/Cambodia/PFC2/2020 (H1N1)        | Takeo           | District 1      | 09 June 2020           |
| A/swine/Cambodia/PFC3/2020 (H1N1)        | Takeo           | District 1      | 02 August 2020         |
| A/swine/Cambodia/PFC4/2020 (H1N1)        | Takeo           | District 1      | 02 August 2020         |
| A/swine/Cambodia/PFC5/2020 (H1N1)        | Takeo           | District 1      | 02 August 2020         |
| A/swine/Cambodia/PFC6/2020 (H1N1)        | Takeo           | District 1      | 01 September 2020      |
| A/swine/Cambodia/PFC8/2020 (H1N1)        | Takeo           | District 1      | 03 October 2020        |
| A/swine/Cambodia/PFC9/2020 (H1N1, H3N2)  | Takeo           | District 1      | 05 October 2020        |
| A/swine/Cambodia/PFC11/2021 (H1N1/H3)    | Takeo           | District 1      | 02 February 2021       |
| A/swine/Cambodia/PFC12/2020 (H1N1)       | Kandal          | District 9      | 18 March 2020          |
| A/swine/Cambodia/PFC13/2020 (H1N1)       | Kandal          | District 9      | 02 June 2020           |
| A/swine/Cambodia/PFC15/2020 (H1N1)       | Kandal          | District 8      | 11 October 2020        |
| A/swine/Cambodia/PFC16/2020 (H1N1, H3N2) | Kandal          | District 8      | 11 October 2020        |
| A/swine/Cambodia/PFC17/2020 (H1N1)       | Kandal          | District 8      | 14 November 2020       |
| A/swine/Cambodia/PFC18/2021 (H1N1, H3N2) | Kandal          | District 8      | 09 February 2021       |
| A/swine/Cambodia/PFC19/2021 (H1N1)       | Kandal          | District 8      | 09 February 2021       |
| A/swine/Cambodia/PFC20/2021 (H1N1/ H3)   | Kandal          | District 8      | 09 February 2021       |
| A/swine/Cambodia/PFC21/2021 (H1N1)       | Kandal          | District 8      | 09 February 2021       |
| A/swine/Cambodia/PFC22/2021 (H1N1, H3N2) | Kandal          | District 8      | 09 February 2021       |
| A/swine/Cambodia/PFC23/2020 (H1N1)       | Phnom Penh      | District 5      | 21 June 2020           |
| A/swine/Cambodia/PFC24/2020 (H1N1)       | Phnom Penh      | District 5      | 21 June 2020           |
| A/swine/Cambodia/PFC25/2020 (H1N1)       | Phnom Penh      | District 7      | 30 July 2020           |
| A/swine/Cambodia/PFC26/2020 (H1N1/N2)    | Phnom Penh      | District 6      | 31 August 2020         |
| A/swine/Cambodia/PFC27/2020 (H1Nx)       | Phnom Penh      | District 6      | 31 August 2020         |
| A/swine/Cambodia/PFC30/2020 (H1N1, H3N2) | Phnom Penh      | District 6      | 31 August 2020         |
| A/swine/Cambodia/PFC32/2020 (H1N1, H3N2) | Phnom Penh      | District 7      | 27 December 2020       |
| A/swine/Cambodia/PFC33/2020 (H1N1)       | Phnom Penh      | District 7      | 27 December 2020       |
| A/swine/Cambodia/PFC37/2021 (H1N1)       | Phnom Penh      | District 6      | 22 February 2021       |
| A/swine/Cambodia/PFC38/2021 (H1N1/N2)    | Phnom Penh      | District 6      | 22 February 2021       |
| A/swine/Cambodia/PFC39/2020 (H1N1)       | Kampong Speu    | District 3      | 07 August 2020         |
| A/swine/Cambodia/PFC41/2020 (H1N1)       | Kampong Speu    | District 3      | 07 August 2020         |
| A/swine/Cambodia/PFC50/2021 (HxN1)       | Phnom Penh      | District 7      | 05 July 2021           |
| A/swine/Cambodia/PFC52/2021 (HxN1)       | Takeo           | District 1      | 19 October 2021        |
| A/swine/Cambodia/PFC53/2021 (H1N1)       | Takeo           | District 1      | 19 October 2021        |
| A/swine/Cambodia/PFC54/2021 (H1N1)       | Takeo           | District 1      | 15 November 2021       |
| A/swine/Cambodia/PFC56/2021 (H1N2)       | Kandal          | District 8      | 10 August 2021         |
| A/swine/Cambodia/PFC57/2021 (H1N1)       | Kandal          | District 8      | 10 August 2021         |
| A/swine/Cambodia/PFC59/2021 (H1N2)       | Kandal          | District 8      | 10 August 2021         |
| A/swine/Cambodia/PFC60/2021 (H1N2)       | Kandal          | District 8      | 10 August 2021         |
| A/swine/Cambodia/PFC63/2021 (H1N1)       | Kandal          | District 9      | 14 August 2021         |
| A/swine/Cambodia/PFC64/2022 (H3N2)       | Kandal          | District 9      | 22 March 2022          |

|                                       |        |            |               |
|---------------------------------------|--------|------------|---------------|
| A/swine/Cambodia/PFC65/2022 (H1N1)    | Kandal | District 9 | 22 March 2022 |
| A/swine/Cambodia/PFC66/2022 (H1N1)    | Kandal | District 9 | 22 March 2022 |
| A/swine/Cambodia/PFC67/2022 (H1N2/H3) | Kandal | District 9 | 23 March 2022 |
| A/swine/Cambodia/PFC72/2022 (H1N1/N2) | Kandal | District 8 | 24 March 2022 |

---



**Table S2. Bayes factor of migration pathways of European avian-like H1 swine between geographic locations.**

| Location            | East China | Europe | North China | Northeast China | South Central China | Southeast Asia | West China |
|---------------------|------------|--------|-------------|-----------------|---------------------|----------------|------------|
| East China          |            | <3     | 22941.3     | 22941.3         | 22941.3             | <3             | 22941.3    |
| Europe              | <3         |        | <3          | <3              | 9.2                 | 288.9          | <3         |
| North China         | 4.5        | <3     |             | 166             | <3                  | <3             | 7.3        |
| Northeast China     | <3         | <3     | 29.9        |                 | 5.9                 | 161            | <3         |
| South Central China | 22941.3    | <3     | <3          | 3819.2          |                     | <3             | 1037.8     |
| Southeast Asia      | <3         | <3     | <3          | <3              | 8                   |                | <3         |
| West China          | <3         | <3     | <3          | <3              | <3                  | <3             |            |

**Table S3. Asymmetric diffusion rates between geographic locations for the European avian-like H1 lineage based on 1,073 sequences.**

| Location            | East China | Europe | North China | Northeast China | Southeast Asia | South Central China | West China |
|---------------------|------------|--------|-------------|-----------------|----------------|---------------------|------------|
| East China          | -          | 0.14   | 2.11*       | 2.51*           | 0.17           | 3.83*               | 1.23*      |
| Europe              | 0.07       | -      | 0.04        | 0.05            | 0.13*          | 0.11*               | 0.03       |
| North China         | 0.62*      | 0.23   | -           | 0.93*           | 0.24           | 0.57                | 0.38*      |
| Northeast China     | 0.30       | 0.26   | 0.53*       | -               | 0.38*          | 0.50*               | 0.31       |
| Southeast Asia      | 0.24       | 0.21   | 0.22        | 0.21            | -              | 0.48*               | 0.23       |
| South Central China | 1.01*      | 0.13   | 0.25        | 1.04*           | 0.25           | -                   | 0.68*      |
| West China          | 0.19       | 0.19   | 0.20        | 0.21            | 0.20           | 0.23                | -          |

\*indicates Bayes factor >3.

**Table S4. Asymmetric diffusion rates between geographic locations for the European avian-like H1 lineage based on 534 sequences.**

| Location            | East China | Europe | North China | Northeast China | Southeast Asia | South Central China | West China |
|---------------------|------------|--------|-------------|-----------------|----------------|---------------------|------------|
| East China          | -          | 0.13   | 1.67*       | 2.62*           | 0.22           | 3.43*               | 1.48*      |
| Europe              | 0.11       | -      | 0.06        | 0.09            | 0.17*          | 0.15*               | 0.06       |
| North China         | 0.71       | 0.19   | -           | 1.13*           | 0.24           | 0.23                | 0.39*      |
| Northeast China     | 0.35*      | 0.20   | 0.48*       | -               | 0.42*          | 0.58*               | 0.40       |
| Southeast Asia      | 0.27       | 0.23   | 0.21        | 0.23            | -              | 0.52*               | 0.21       |
| South Central China | 0.76*      | 0.14   | 0.17        | 0.72*           | 0.34           | -                   | 0.33       |
| West China          | 0.20       | 0.19   | 0.20        | 0.22            | 0.37*          | 0.32                | -          |

\*indicates Bayes factor >3.

**Table S5. Pork production, number of pigs and pork consumption in different regions.**

| Regions             | Pork production (tons) | Number of Pigs | Pork consumption (tons) |
|---------------------|------------------------|----------------|-------------------------|
| East China          | 13601621               | 92947000       | 7692865                 |
| Europe              | 29172533               | 187790934      | 25542933                |
| North China         | 4694674                | 32997000       | 2224504                 |
| Northeast China     | 5163511                | 36530000       | 1818294                 |
| Southeast Asia      | 4745322                | 37191123       | 4524085                 |
| South Central China | 18331176               | 157627000      | 8951773                 |
| West China          | 12726976               | 121487000      | 7249857                 |

**Table S6. GenBank accession numbers for influenza sequences generated in this study.****PB2**

| <b>Strains</b>              | <b>Accession number</b> |
|-----------------------------|-------------------------|
| A/swine/Cambodia/PFC1/2020  | OQ460074                |
| A/swine/Cambodia/PFC2/2020  | OQ460106                |
| A/swine/Cambodia/PFC3/2020  | OQ459860                |
| A/swine/Cambodia/PFC4/2020  | OQ460130                |
| A/swine/Cambodia/PFC5/2020  | OQ459861                |
| A/swine/Cambodia/PFC6/2020  | OQ460170                |
| A/swine/Cambodia/PFC8/2020  | OQ460218                |
| A/swine/Cambodia/PFC9/2020  | OQ459862                |
| A/swine/Cambodia/PFC11/2021 | OQ459863                |
| A/swine/Cambodia/PFC12/2020 | OQ460082                |
| A/swine/Cambodia/PFC13/2020 | OQ460090                |
| A/swine/Cambodia/PFC15/2020 | OQ459864                |
| A/swine/Cambodia/PFC16/2020 | OQ459865                |
| A/swine/Cambodia/PFC17/2020 | OQ459866                |
| A/swine/Cambodia/PFC18/2021 | OQ459867                |
| A/swine/Cambodia/PFC19/2021 | OQ460098                |
| A/swine/Cambodia/PFC20/2021 | OQ459868                |
| A/swine/Cambodia/PFC21/2021 | OQ459869                |
| A/swine/Cambodia/PFC22/2021 | OQ459870                |
| A/swine/Cambodia/PFC23/2020 | OQ460114                |
| A/swine/Cambodia/PFC24/2020 | OQ459871                |
| A/swine/Cambodia/PFC25/2020 | OQ459872                |
| A/swine/Cambodia/PFC26/2020 | OQ459873                |
| A/swine/Cambodia/PFC30/2020 | OQ459874                |
| A/swine/Cambodia/PFC32/2020 | OQ459875                |
| A/swine/Cambodia/PFC33/2020 | OQ459876                |
| A/swine/Cambodia/PFC37/2021 | OQ459877                |
| A/swine/Cambodia/PFC38/2021 | OQ459878                |
| A/swine/Cambodia/PFC39/2020 | OQ460122                |
| A/swine/Cambodia/PFC41/2020 | OQ459879                |
| A/swine/Cambodia/PFC50/2021 | OQ459880                |
| A/swine/Cambodia/PFC53/2021 | OQ460138                |
| A/swine/Cambodia/PFC54/2021 | OQ460146                |
| A/swine/Cambodia/PFC56/2021 | OQ459881                |
| A/swine/Cambodia/PFC57/2021 | OQ460154                |
| A/swine/Cambodia/PFC59/2021 | OQ460162                |
| A/swine/Cambodia/PFC60/2021 | OQ460178                |
| A/swine/Cambodia/PFC63/2021 | OQ460186                |
| A/swine/Cambodia/PFC64/2022 | OQ460194                |
| A/swine/Cambodia/PFC65/2022 | OQ460202                |
| A/swine/Cambodia/PFC66/2022 | OQ460210                |

**PB1**

---

| Strains                     | Accession number |
|-----------------------------|------------------|
| A/swine/Cambodia/PFC1/2020  | OQ460075         |
| A/swine/Cambodia/PFC2/2020  | OQ460107         |
| A/swine/Cambodia/PFC3/2020  | OQ459883         |
| A/swine/Cambodia/PFC4/2020  | OQ460131         |
| A/swine/Cambodia/PFC5/2020  | OQ459884         |
| A/swine/Cambodia/PFC6/2020  | OQ460171         |
| A/swine/Cambodia/PFC8/2020  | OQ460219         |
| A/swine/Cambodia/PFC9/2020  | OQ459885         |
| A/swine/Cambodia/PFC11/2021 | OQ459886         |
| A/swine/Cambodia/PFC12/2020 | OQ460083         |
| A/swine/Cambodia/PFC13/2020 | OQ460091         |
| A/swine/Cambodia/PFC15/2020 | OQ459887         |
| A/swine/Cambodia/PFC16/2020 | OQ459888         |
| A/swine/Cambodia/PFC17/2020 | OQ459889         |
| A/swine/Cambodia/PFC18/2021 | OQ459890         |
| A/swine/Cambodia/PFC19/2021 | OQ460099         |
| A/swine/Cambodia/PFC21/2021 | OQ459891         |
| A/swine/Cambodia/PFC22/2021 | OQ459892         |
| A/swine/Cambodia/PFC23/2020 | OQ460115         |
| A/swine/Cambodia/PFC24/2020 | OQ459893         |
| A/swine/Cambodia/PFC25/2020 | OQ459894         |
| A/swine/Cambodia/PFC26/2020 | OQ459895         |
| A/swine/Cambodia/PFC30/2020 | OQ459896         |
| A/swine/Cambodia/PFC32/2020 | OQ459897         |
| A/swine/Cambodia/PFC33/2020 | OQ459898         |
| A/swine/Cambodia/PFC37/2021 | OQ459899         |
| A/swine/Cambodia/PFC38/2021 | OQ459900         |
| A/swine/Cambodia/PFC39/2020 | OQ460123         |
| A/swine/Cambodia/PFC41/2020 | OQ459901         |
| A/swine/Cambodia/PFC50/2021 | OQ459902         |
| A/swine/Cambodia/PFC52/2021 | OQ459903         |
| A/swine/Cambodia/PFC53/2021 | OQ460139         |
| A/swine/Cambodia/PFC54/2021 | OQ460147         |
| A/swine/Cambodia/PFC57/2021 | OQ460155         |
| A/swine/Cambodia/PFC59/2021 | OQ460163         |
| A/swine/Cambodia/PFC60/2021 | OQ460179         |
| A/swine/Cambodia/PFC63/2021 | OQ460187         |
| A/swine/Cambodia/PFC64/2022 | OQ460195         |
| A/swine/Cambodia/PFC65/2022 | OQ460203         |
| A/swine/Cambodia/PFC66/2022 | OQ460211         |
| A/swine/Cambodia/PFC72/2022 | OQ459904         |

---

**PA**

| Strains                     | Accession number |
|-----------------------------|------------------|
| A/swine/Cambodia/PFC1/2020  | OQ460076         |
| A/swine/Cambodia/PFC2/2020  | OQ460108         |
| A/swine/Cambodia/PFC3/2020  | OQ459905         |
| A/swine/Cambodia/PFC4/2020  | OQ460132         |
| A/swine/Cambodia/PFC5/2020  | OQ459906         |
| A/swine/Cambodia/PFC6/2020  | OQ460172         |
| A/swine/Cambodia/PFC8/2020  | OQ460220         |
| A/swine/Cambodia/PFC9/2020  | OQ459907         |
| A/swine/Cambodia/PFC11/2021 | OQ459908         |
| A/swine/Cambodia/PFC12/2020 | OQ460084         |
| A/swine/Cambodia/PFC13/2020 | OQ460092         |
| A/swine/Cambodia/PFC15/2020 | OQ459909         |
| A/swine/Cambodia/PFC16/2020 | OQ459910         |
| A/swine/Cambodia/PFC17/2020 | OQ459911         |
| A/swine/Cambodia/PFC18/2021 | OQ459912         |
| A/swine/Cambodia/PFC19/2021 | OQ460100         |
| A/swine/Cambodia/PFC20/2021 | OQ459913         |
| A/swine/Cambodia/PFC21/2021 | OQ459914         |
| A/swine/Cambodia/PFC22/2021 | OQ459915         |
| A/swine/Cambodia/PFC23/2020 | OQ460116         |
| A/swine/Cambodia/PFC24/2020 | OQ459916         |
| A/swine/Cambodia/PFC25/2020 | OQ459917         |
| A/swine/Cambodia/PFC26/2020 | OQ459918         |
| A/swine/Cambodia/PFC30/2020 | OQ459919         |
| A/swine/Cambodia/PFC32/2020 | OQ459920         |
| A/swine/Cambodia/PFC33/2020 | OQ459921         |
| A/swine/Cambodia/PFC37/2021 | OQ459922         |
| A/swine/Cambodia/PFC38/2021 | OQ459923         |
| A/swine/Cambodia/PFC39/2020 | OQ460124         |
| A/swine/Cambodia/PFC41/2020 | OQ459924         |
| A/swine/Cambodia/PFC53/2021 | OQ460140         |
| A/swine/Cambodia/PFC54/2021 | OQ460148         |
| A/swine/Cambodia/PFC56/2021 | OQ459925         |
| A/swine/Cambodia/PFC57/2021 | OQ460156         |
| A/swine/Cambodia/PFC59/2021 | OQ460164         |
| A/swine/Cambodia/PFC60/2021 | OQ460180         |
| A/swine/Cambodia/PFC63/2021 | OQ460188         |
| A/swine/Cambodia/PFC64/2022 | OQ460196         |
| A/swine/Cambodia/PFC65/2022 | OQ460204         |
| A/swine/Cambodia/PFC66/2022 | OQ460212         |
| A/swine/Cambodia/PFC67/2022 | OQ459926         |
| A/swine/Cambodia/PFC72/2022 | OQ459927         |

## H1-HA

| Strains                       | Accession number |
|-------------------------------|------------------|
| A/swine/Cambodia/PFC1/2020    | OQ460077         |
| A/swine/Cambodia/PFC2/2020    | OQ460109         |
| A/swine/Cambodia/PFC3_CS/2020 | OQ459928         |
| A/swine/Cambodia/PFC3/2020    | OQ459929         |
| A/swine/Cambodia/PFC4/2020    | OQ460133         |
| A/swine/Cambodia/PFC5/2020    | OQ459930         |
| A/swine/Cambodia/PFC6/2020    | OQ460173         |
| A/swine/Cambodia/PFC8/2020    | OQ460221         |
| A/swine/Cambodia/PFC9/2020    | OQ459931         |
| A/swine/Cambodia/PFC11/2021   | OQ459932         |
| A/swine/Cambodia/PFC12/2020   | OQ460085         |
| A/swine/Cambodia/PFC13/2020   | OQ460093         |
| A/swine/Cambodia/PFC15/2020   | OQ459933         |
| A/swine/Cambodia/PFC16/2020   | OQ459934         |
| A/swine/Cambodia/PFC17/2020   | OQ459935         |
| A/swine/Cambodia/PFC18/2021   | OQ459936         |
| A/swine/Cambodia/PFC19/2021   | OQ460101         |
| A/swine/Cambodia/PFC20/2021   | OQ459937         |
| A/swine/Cambodia/PFC21/2021   | OQ459938         |
| A/swine/Cambodia/PFC22/2021   | OQ459939         |
| A/swine/Cambodia/PFC23/2020   | OQ460117         |
| A/swine/Cambodia/PFC24/2020   | OQ459940         |
| A/swine/Cambodia/PFC25/2020   | OQ459941         |
| A/swine/Cambodia/PFC26/2020   | OQ459942         |
| A/swine/Cambodia/PFC27/2020   | OQ459943         |
| A/swine/Cambodia/PFC30/2020   | OQ459944         |
| A/swine/Cambodia/PFC32/2020   | OQ459945         |
| A/swine/Cambodia/PFC33/2020   | OQ459946         |
| A/swine/Cambodia/PFC37/2021   | OQ459947         |
| A/swine/Cambodia/PFC38/2021   | OQ459948         |
| A/swine/Cambodia/PFC39/2020   | OQ460125         |
| A/swine/Cambodia/PFC41/2020   | OQ459949         |
| A/swine/Cambodia/PFC53/2021   | OQ460141         |
| A/swine/Cambodia/PFC54/2021   | OQ460149         |
| A/swine/Cambodia/PFC56/2021   | OQ459950         |
| A/swine/Cambodia/PFC57/2021   | OQ460157         |
| A/swine/Cambodia/PFC59/2021   | OQ460165         |
| A/swine/Cambodia/PFC60/2021   | OQ460181         |
| A/swine/Cambodia/PFC63/2021   | OQ460189         |
| A/swine/Cambodia/PFC65/2022   | OQ460205         |
| A/swine/Cambodia/PFC66/2022   | OQ460213         |
| A/swine/Cambodia/PFC67/2022   | OQ459951         |
| A/swine/Cambodia/PFC72/2022   | OQ459952         |

### H3-HA

| Strains                     | Accession number |
|-----------------------------|------------------|
| A/swine/Cambodia/PFC9/2020  | OQ459953         |
| A/swine/Cambodia/PFC11/2021 | OQ459954         |
| A/swine/Cambodia/PFC16/2020 | OQ459955         |
| A/swine/Cambodia/PFC18/2021 | OQ459956         |
| A/swine/Cambodia/PFC20/2021 | OQ459957         |
| A/swine/Cambodia/PFC22/2021 | OQ459958         |
| A/swine/Cambodia/PFC30/2020 | OQ459959         |
| A/swine/Cambodia/PFC32/2020 | OQ459960         |
| A/swine/Cambodia/PFC64/2022 | OQ460197         |
| A/swine/Cambodia/PFC67/2022 | OQ459961         |

### NP

| Strains                     | Accession number |
|-----------------------------|------------------|
| A/swine/Cambodia/PFC1/2020  | OQ460078         |
| A/swine/Cambodia/PFC2/2020  | OQ460110         |
| A/swine/Cambodia/PFC3/2020  | OQ459962         |
| A/swine/Cambodia/PFC4/2020  | OQ460134         |
| A/swine/Cambodia/PFC5/2020  | OQ459963         |
| A/swine/Cambodia/PFC6/2020  | OQ460174         |
| A/swine/Cambodia/PFC8/2020  | OQ460222         |
| A/swine/Cambodia/PFC9/2020  | OQ459964         |
| A/swine/Cambodia/PFC11/2021 | OQ459965         |
| A/swine/Cambodia/PFC12/2020 | OQ460086         |
| A/swine/Cambodia/PFC13/2020 | OQ460094         |
| A/swine/Cambodia/PFC15/2020 | OQ459966         |
| A/swine/Cambodia/PFC16/2020 | OQ459967         |
| A/swine/Cambodia/PFC17/2020 | OQ459968         |
| A/swine/Cambodia/PFC18/2021 | OQ459969         |
| A/swine/Cambodia/PFC19/2021 | OQ460102         |
| A/swine/Cambodia/PFC20/2021 | OQ459970         |
| A/swine/Cambodia/PFC21/2021 | OQ459971         |
| A/swine/Cambodia/PFC22/2021 | OQ459972         |
| A/swine/Cambodia/PFC23/2020 | OQ460118         |
| A/swine/Cambodia/PFC24/2020 | OQ459973         |
| A/swine/Cambodia/PFC25/2020 | OQ459974         |
| A/swine/Cambodia/PFC26/2020 | OQ459975         |
| A/swine/Cambodia/PFC27/2020 | OQ459976         |
| A/swine/Cambodia/PFC30/2020 | OQ459977         |
| A/swine/Cambodia/PFC32/2020 | OQ459978         |
| A/swine/Cambodia/PFC33/2020 | OQ459979         |
| A/swine/Cambodia/PFC37/2021 | OQ459980         |
| A/swine/Cambodia/PFC38/2021 | OQ459981         |
| A/swine/Cambodia/PFC39/2020 | OQ460126         |
| A/swine/Cambodia/PFC41/2020 | OQ459982         |
| A/swine/Cambodia/PFC50/2021 | OQ459983         |
| A/swine/Cambodia/PFC52/2021 | OQ459984         |

|                             |          |
|-----------------------------|----------|
| A/swine/Cambodia/PFC53/2021 | OQ460142 |
| A/swine/Cambodia/PFC54/2021 | OQ460150 |
| A/swine/Cambodia/PFC56/2021 | OQ459985 |
| A/swine/Cambodia/PFC57/2021 | OQ460158 |
| A/swine/Cambodia/PFC59/2021 | OQ460166 |
| A/swine/Cambodia/PFC60/2021 | OQ460182 |
| A/swine/Cambodia/PFC63/2021 | OQ460190 |
| A/swine/Cambodia/PFC64/2022 | OQ460198 |
| A/swine/Cambodia/PFC65/2022 | OQ460206 |
| A/swine/Cambodia/PFC66/2022 | OQ460214 |
| A/swine/Cambodia/PFC67/2022 | OQ459986 |
| A/swine/Cambodia/PFC72/2022 | OQ459987 |

---

## N1-NA

| Strains                     | Accession number |
|-----------------------------|------------------|
| A/swine/Cambodia/PFC1/2020  | OQ460079         |
| A/swine/Cambodia/PFC2/2020  | OQ460111         |
| A/swine/Cambodia/PFC3/2020  | OQ459988         |
| A/swine/Cambodia/PFC4/2020  | OQ460135         |
| A/swine/Cambodia/PFC5/2020  | OQ459989         |
| A/swine/Cambodia/PFC6/2020  | OQ460175         |
| A/swine/Cambodia/PFC8/2020  | OQ460223         |
| A/swine/Cambodia/PFC9/2020  | OQ459990         |
| A/swine/Cambodia/PFC11/2021 | OQ459991         |
| A/swine/Cambodia/PFC12/2020 | OQ460087         |
| A/swine/Cambodia/PFC13/2020 | OQ460095         |
| A/swine/Cambodia/PFC15/2020 | OQ459992         |
| A/swine/Cambodia/PFC16/2020 | OQ459993         |
| A/swine/Cambodia/PFC17/2020 | OQ459994         |
| A/swine/Cambodia/PFC18/2021 | OQ459995         |
| A/swine/Cambodia/PFC19/2021 | OQ460103         |
| A/swine/Cambodia/PFC20/2021 | OQ459996         |
| A/swine/Cambodia/PFC21/2021 | OQ459997         |
| A/swine/Cambodia/PFC22/2021 | OQ459998         |
| A/swine/Cambodia/PFC23/2020 | OQ460119         |
| A/swine/Cambodia/PFC24/2020 | OQ459999         |
| A/swine/Cambodia/PFC25/2020 | OQ460000         |
| A/swine/Cambodia/PFC26/2020 | OQ460001         |
| A/swine/Cambodia/PFC30/2020 | OQ460002         |
| A/swine/Cambodia/PFC32/2020 | OQ460003         |
| A/swine/Cambodia/PFC33/2020 | OQ460004         |
| A/swine/Cambodia/PFC37/2021 | OQ460005         |
| A/swine/Cambodia/PFC38/2021 | OQ460006         |
| A/swine/Cambodia/PFC39/2020 | OQ460127         |
| A/swine/Cambodia/PFC41/2020 | OQ460007         |
| A/swine/Cambodia/PFC50/2021 | OQ460008         |



|                             |          |
|-----------------------------|----------|
| A/swine/Cambodia/PFC52/2021 | OQ460009 |
| A/swine/Cambodia/PFC53/2021 | OQ460143 |
| A/swine/Cambodia/PFC54/2021 | OQ460151 |
| A/swine/Cambodia/PFC57/2021 | OQ460159 |
| A/swine/Cambodia/PFC63/2021 | OQ460191 |
| A/swine/Cambodia/PFC65/2022 | OQ460207 |
| A/swine/Cambodia/PFC66/2022 | OQ460215 |
| A/swine/Cambodia/PFC72/2022 | OQ460010 |

---

## N2-NA

| Strains                     | Accession number |
|-----------------------------|------------------|
| A/swine/Cambodia/PFC9/2020  | OQ460011         |
| A/swine/Cambodia/PFC16/2020 | OQ460012         |
| A/swine/Cambodia/PFC18/2021 | OQ460013         |
| A/swine/Cambodia/PFC22/2021 | OQ460014         |
| A/swine/Cambodia/PFC26/2020 | OQ460015         |
| A/swine/Cambodia/PFC30/2020 | OQ460016         |
| A/swine/Cambodia/PFC32/2020 | OQ460017         |
| A/swine/Cambodia/PFC38/2021 | OQ460018         |
| A/swine/Cambodia/PFC56/2021 | OQ460019         |
| A/swine/Cambodia/PFC59/2021 | OQ460167         |
| A/swine/Cambodia/PFC60/2021 | OQ460183         |
| A/swine/Cambodia/PFC64/2022 | OQ460199         |
| A/swine/Cambodia/PFC67/2022 | OQ460020         |
| A/swine/Cambodia/PFC72/2022 | OQ460021         |

---

## MP

| Strains                     | Accession number |
|-----------------------------|------------------|
| A/swine/Cambodia/PFC1/2020  | OQ460080         |
| A/swine/Cambodia/PFC2/2020  | OQ460112         |
| A/swine/Cambodia/PFC3/2020  | OQ460022         |
| A/swine/Cambodia/PFC4/2020  | OQ460136         |
| A/swine/Cambodia/PFC5/2020  | OQ460023         |
| A/swine/Cambodia/PFC6/2020  | OQ460176         |
| A/swine/Cambodia/PFC8/2020  | OQ460224         |
| A/swine/Cambodia/PFC9/2020  | OQ460024         |
| A/swine/Cambodia/PFC11/2021 | OQ460025         |
| A/swine/Cambodia/PFC12/2020 | OQ460088         |
| A/swine/Cambodia/PFC13/2020 | OQ460096         |
| A/swine/Cambodia/PFC15/2020 | OQ460026         |
| A/swine/Cambodia/PFC16/2020 | OQ460027         |
| A/swine/Cambodia/PFC17/2020 | OQ460028         |
| A/swine/Cambodia/PFC18/2021 | OQ460029         |
| A/swine/Cambodia/PFC19/2021 | OQ460104         |
| A/swine/Cambodia/PFC20/2021 | OQ460030         |

|                             |          |
|-----------------------------|----------|
| A/swine/Cambodia/PFC21/2021 | OQ460031 |
| A/swine/Cambodia/PFC22/2021 | OQ460032 |
| A/swine/Cambodia/PFC23/2020 | OQ460120 |
| A/swine/Cambodia/PFC24/2020 | OQ460033 |
| A/swine/Cambodia/PFC25/2020 | OQ460034 |
| A/swine/Cambodia/PFC26/2020 | OQ460035 |
| A/swine/Cambodia/PFC27/2020 | OQ460036 |
| A/swine/Cambodia/PFC30/2020 | OQ460037 |
| A/swine/Cambodia/PFC32/2020 | OQ460038 |
| A/swine/Cambodia/PFC33/2020 | OQ460039 |
| A/swine/Cambodia/PFC37/2021 | OQ460040 |
| A/swine/Cambodia/PFC38/2021 | OQ460041 |
| A/swine/Cambodia/PFC39/2020 | OQ460128 |
| A/swine/Cambodia/PFC41/2020 | OQ460042 |
| A/swine/Cambodia/PFC50/2021 | OQ460043 |
| A/swine/Cambodia/PFC52/2021 | OQ460044 |
| A/swine/Cambodia/PFC53/2021 | OQ460144 |
| A/swine/Cambodia/PFC54/2021 | OQ460152 |
| A/swine/Cambodia/PFC56/2021 | OQ460045 |
| A/swine/Cambodia/PFC57/2021 | OQ460160 |
| A/swine/Cambodia/PFC59/2021 | OQ460168 |
| A/swine/Cambodia/PFC60/2021 | OQ460184 |
| A/swine/Cambodia/PFC63/2021 | OQ460192 |
| A/swine/Cambodia/PFC64/2022 | OQ460200 |
| A/swine/Cambodia/PFC65/2022 | OQ460208 |
| A/swine/Cambodia/PFC66/2022 | OQ460216 |
| A/swine/Cambodia/PFC67/2022 | OQ460046 |
| A/swine/Cambodia/PFC72/2022 | OQ460047 |

---

## NS

| Strains                     | Accession number |
|-----------------------------|------------------|
| A/swine/Cambodia/PFC1/2020  | OQ460081         |
| A/swine/Cambodia/PFC2/2020  | OQ460113         |
| A/swine/Cambodia/PFC3/2020  | OQ460048         |
| A/swine/Cambodia/PFC4/2020  | OQ460137         |
| A/swine/Cambodia/PFC5/2020  | OQ460049         |
| A/swine/Cambodia/PFC6/2020  | OQ460177         |
| A/swine/Cambodia/PFC8/2020  | OQ460225         |
| A/swine/Cambodia/PFC9/2020  | OQ460050         |
| A/swine/Cambodia/PFC11/2021 | OQ460051         |
| A/swine/Cambodia/PFC12/2020 | OQ460089         |
| A/swine/Cambodia/PFC13/2020 | OQ460097         |
| A/swine/Cambodia/PFC15/2020 | OQ460052         |
| A/swine/Cambodia/PFC16/2020 | OQ460053         |
| A/swine/Cambodia/PFC17/2020 | OQ460054         |

|                             |          |
|-----------------------------|----------|
| A/swine/Cambodia/PFC18/2021 | OQ460055 |
| A/swine/Cambodia/PFC19/2021 | OQ460105 |
| A/swine/Cambodia/PFC20/2021 | OQ460056 |
| A/swine/Cambodia/PFC21/2021 | OQ460057 |
| A/swine/Cambodia/PFC22/2021 | OQ460058 |
| A/swine/Cambodia/PFC23/2020 | OQ460121 |
| A/swine/Cambodia/PFC24/2020 | OQ460059 |
| A/swine/Cambodia/PFC25/2020 | OQ460060 |
| A/swine/Cambodia/PFC26/2020 | OQ460061 |
| A/swine/Cambodia/PFC27/2020 | OQ460062 |
| A/swine/Cambodia/PFC30/2020 | OQ460063 |
| A/swine/Cambodia/PFC32/2020 | OQ460064 |
| A/swine/Cambodia/PFC33/2020 | OQ460065 |
| A/swine/Cambodia/PFC37/2021 | OQ460066 |
| A/swine/Cambodia/PFC38/2021 | OQ460067 |
| A/swine/Cambodia/PFC39/2020 | OQ460129 |
| A/swine/Cambodia/PFC41/2020 | OQ460068 |
| A/swine/Cambodia/PFC50/2021 | OQ460069 |
| A/swine/Cambodia/PFC52/2021 | OQ460070 |
| A/swine/Cambodia/PFC53/2021 | OQ460145 |
| A/swine/Cambodia/PFC54/2021 | OQ460153 |
| A/swine/Cambodia/PFC56/2021 | OQ460071 |
| A/swine/Cambodia/PFC57/2021 | OQ460161 |
| A/swine/Cambodia/PFC59/2021 | OQ460169 |
| A/swine/Cambodia/PFC60/2021 | OQ460185 |
| A/swine/Cambodia/PFC63/2021 | OQ460193 |
| A/swine/Cambodia/PFC64/2022 | OQ460201 |
| A/swine/Cambodia/PFC65/2022 | OQ460209 |
| A/swine/Cambodia/PFC66/2022 | OQ460217 |
| A/swine/Cambodia/PFC67/2022 | OQ460072 |
| A/swine/Cambodia/PFC72/2022 | OQ460073 |

---
